# Supplementary material for: Development of benzofuran-derived sulfamates as dual aromatase-steroid sulfatase inhibitors (DASIs): design, synthesis and biological evaluation
Source: Royal Society of Chemistry journal article supplement (doi:10.1039/d4md00795f), 2025-01-01
Supplement: d4md00795f1.pdf [file d4md00795f1.pdf]

SUPPORTING INFORMATION

**Development of benzofuran derived sulfamates as dual aromatase-steroid sulfatase inhibitors (DASIs): Design, synthesis and biological evaluation**

Ahmed G. Eissa, Francesca Gozzi, Oqab Aloqab, Charlotte E. Parrish, Nadira Mohamed, Irene Shiali, Harith Al-Baldawi, Paul A. Foster, Claire Simons

|                                                                                                                                                                                               |        |
|-----------------------------------------------------------------------------------------------------------------------------------------------------------------------------------------------|--------|
| <b>Figure S1.</b> Comparison between the $^1\text{H}$ NMR spectra of the sulfamate ( <b>10a</b> ) and carbamate ( <b>10b</b> ) products indicating the difference in the amino group signals. | S2     |
| $^1\text{H}$ , $^{13}\text{C}$ , $^{19}\text{F}$ NMR and HPLC of final compounds                                                                                                              | S3-S29 |

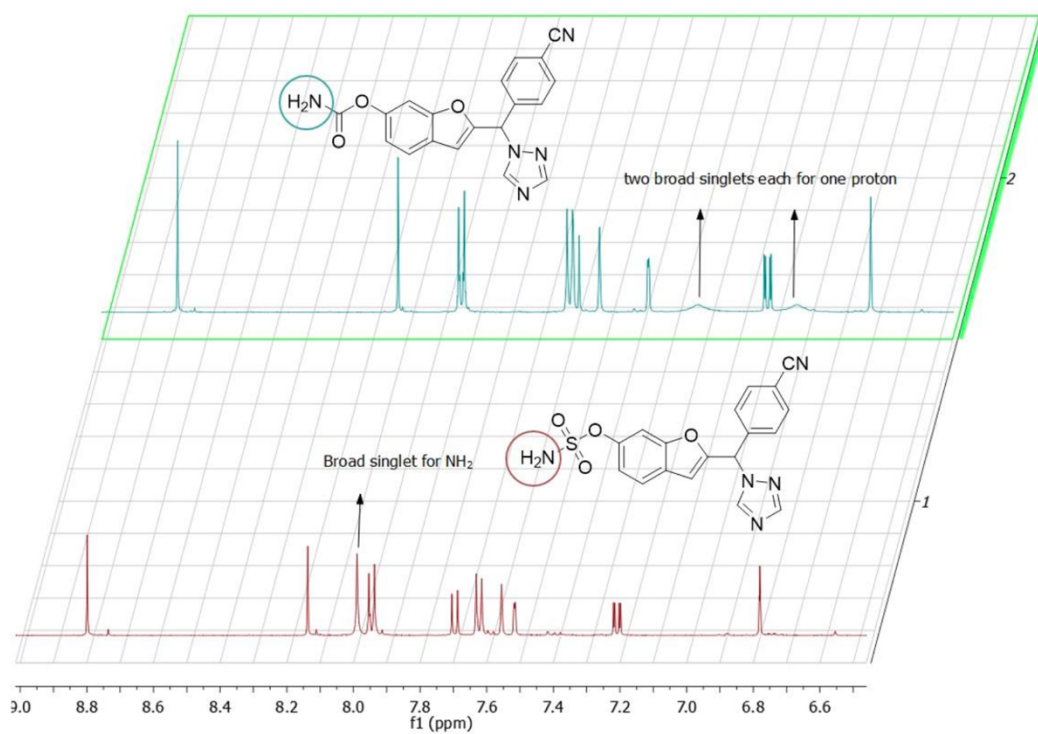

**Figure S1.** Comparison between the <sup>1</sup>H NMR spectra of the sulfamate (**10a**) and carbamate (**10b**) products indicating the difference in the amino group signals.

Compound 6

$^1\text{H}$  NMR (DMSO- $d_6$ )

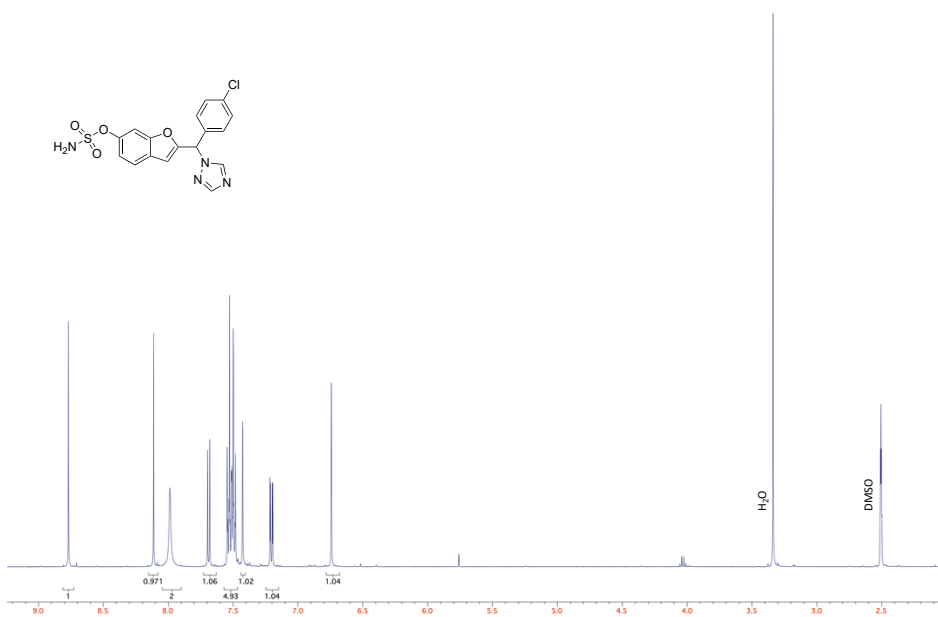

$^{13}\text{C}$  NMR (DMSO- $d_6$ )

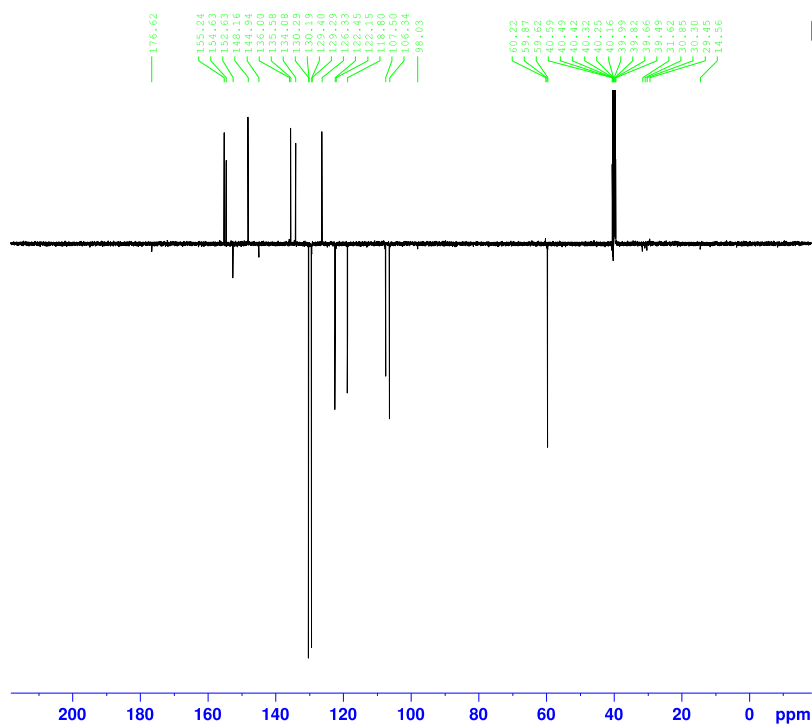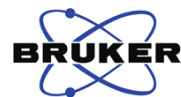

Current Data Parameters  
 NAME AB55  
 EXPNO 3  
 PROCNO 1

F2 - Acquisition Parameters  
 Date\_ 20190222  
 Time 20:52 h  
 INSTRUM spect  
 PROBHD Z113652\_0266 ( jmod  
 PULPROG 65336  
 TD 55336  
 SOLVENT DMSO  
 NS 2048  
 DS 4  
 SWH 29761.904 Hz  
 FIDRES 0.908261 Hz  
 AQ 1.1010048 sec  
 RG 189.93  
 DW 16.800 usec  
 DE 6.50 usec  
 TE 298.2 K  
 CNST2 145.000000  
 CNST11 1.000000  
 D1 2.0000000 sec  
 D20 0.00689655 sec  
 TD0 1  
 SFO1 125.7703643 MHz  
 NUC1 13C  
 P1 10.00 usec  
 P2 20.00 usec  
 PLW1 74.02700043 W  
 SFO2 500.1320005 MHz  
 NUC2 1H  
 CPEPRG[2] waltz16  
 PCPD2 80.00 usec  
 PLW2 21.07600021 W  
 PLW12 0.32931000 W

F2 - Processing parameters  
 SI 32768  
 SF 125.7577885 MHz  
 WDW EM  
 SSB 0  
 LB 1.00 Hz  
 GB 0  
 PC 1.40

## HPLC

mV

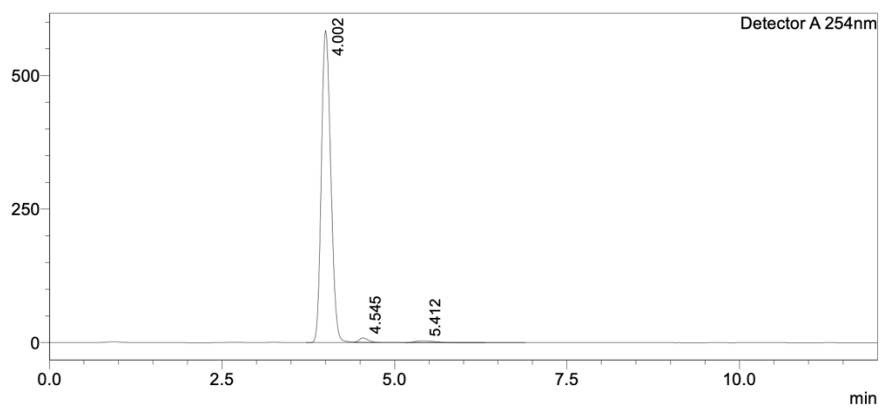

### <Peak Table>

| Peak# | Ret. Time | Area    | Height | Conc.  | Area%   |
|-------|-----------|---------|--------|--------|---------|
| 1     | 4.002     | 5616899 | 583925 | 97.697 | 97.697  |
| 2     | 4.545     | 68644   | 7868   | 1.194  | 1.194   |
| 3     | 5.412     | 63752   | 2997   | 1.109  | 1.109   |
| Total |           | 5749295 | 594791 |        | 100.000 |

## Compound 7

$^1\text{H}$  NMR ( $\text{DMSO-}d_6$ )

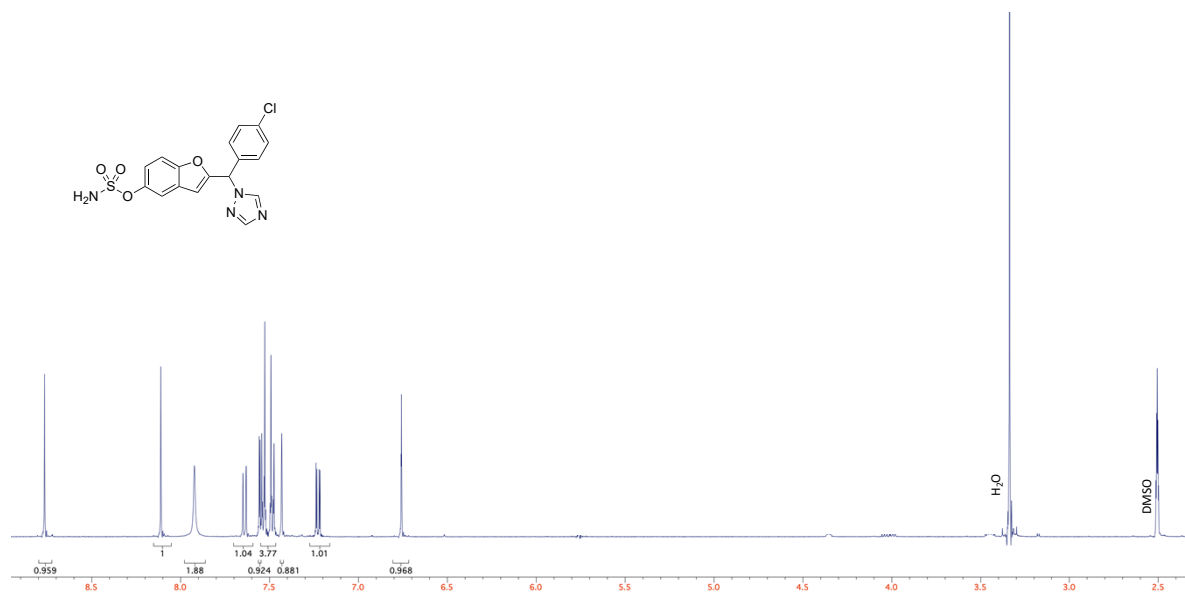

$^{13}\text{C}$  NMR ( $\text{DMSO-}d_6$ )

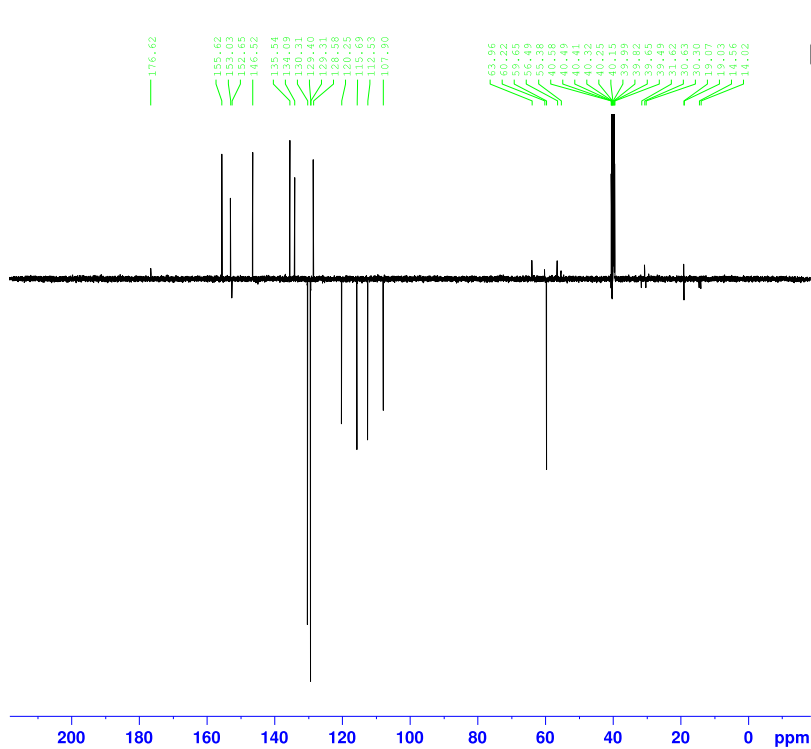

HPLC data

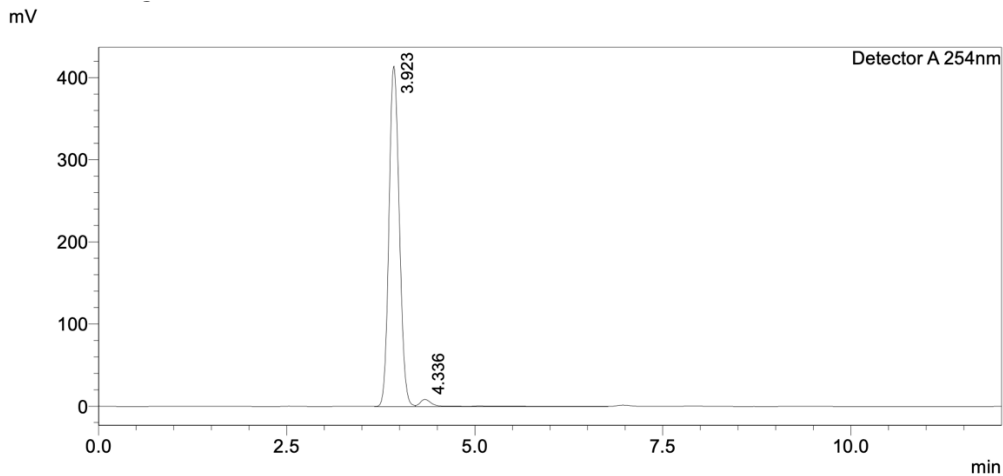

<Peak Table>

| Detector A 254nm |           |         |        |        |         |
|------------------|-----------|---------|--------|--------|---------|
| Peak#            | Ret. Time | Area    | Height | Conc.  | Area%   |
| 1                | 3.923     | 3974368 | 414070 | 97.481 | 97.481  |
| 2                | 4.336     | 102705  | 8574   | 2.519  | 2.519   |
| Total            |           | 4077072 | 422644 |        | 100.000 |

# Compound 8a

<sup>1</sup>H NMR (DMSO-*d*<sub>6</sub>)

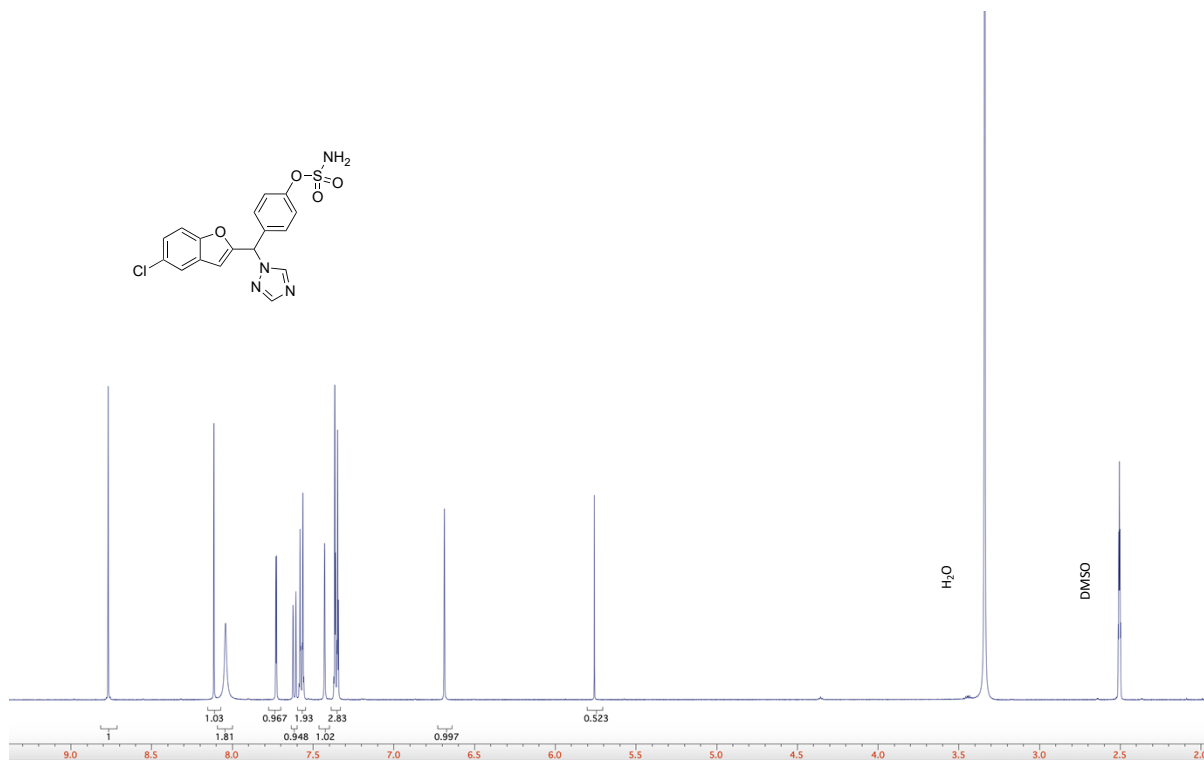

<sup>13</sup>C NMR (DMSO-*d*<sub>6</sub>)

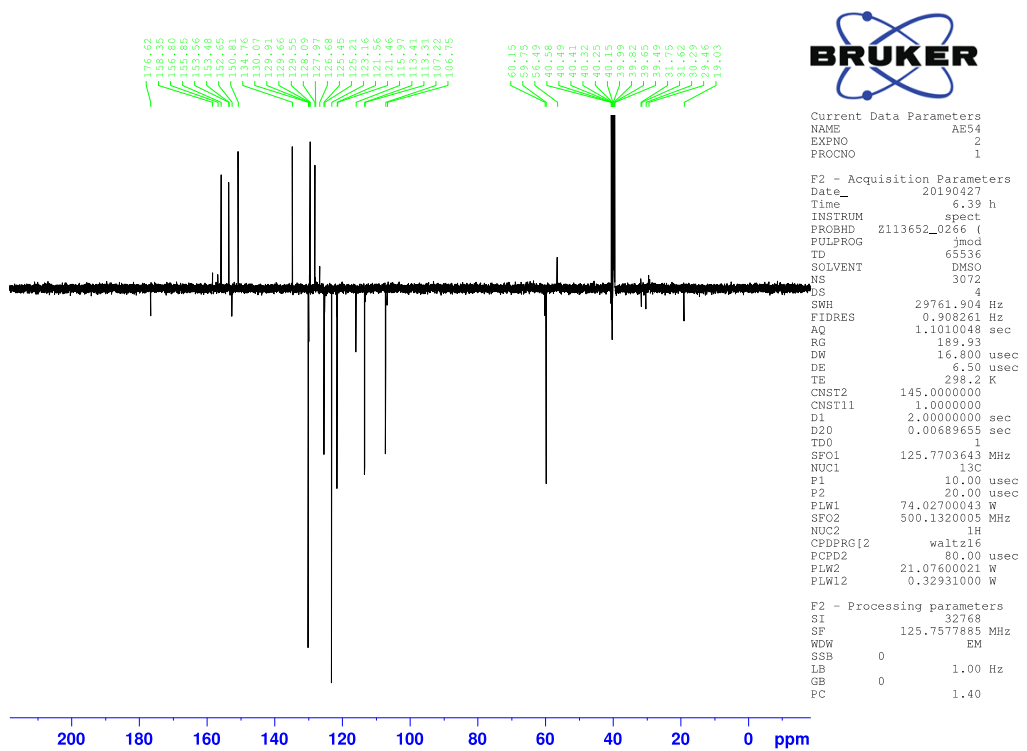

## HPLC

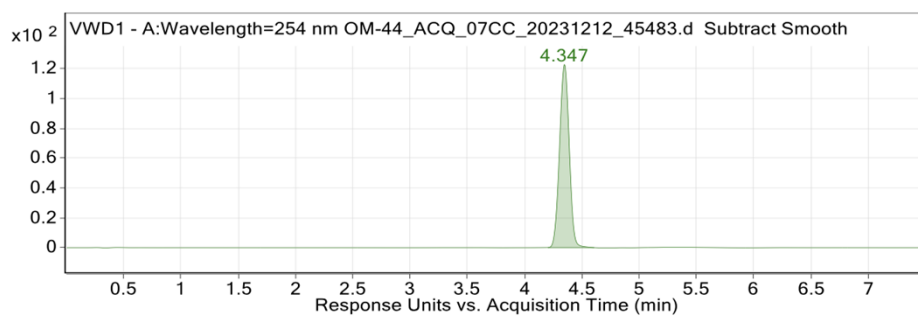

Figure: Base peak or HPLC chromatogram (indicated in left hand corner)

### User Chromatogram Peak List

| RT (min) | Area   | Area % | Area Sum (%) | Symmetry | Width (min) |
|----------|--------|--------|--------------|----------|-------------|
| 4.35     | 722.42 | 100.00 | 100.00       | 1.03     | 0.402       |

## Compound **8b**

$^1\text{H}$  NMR (DMSO- $d_6$ )

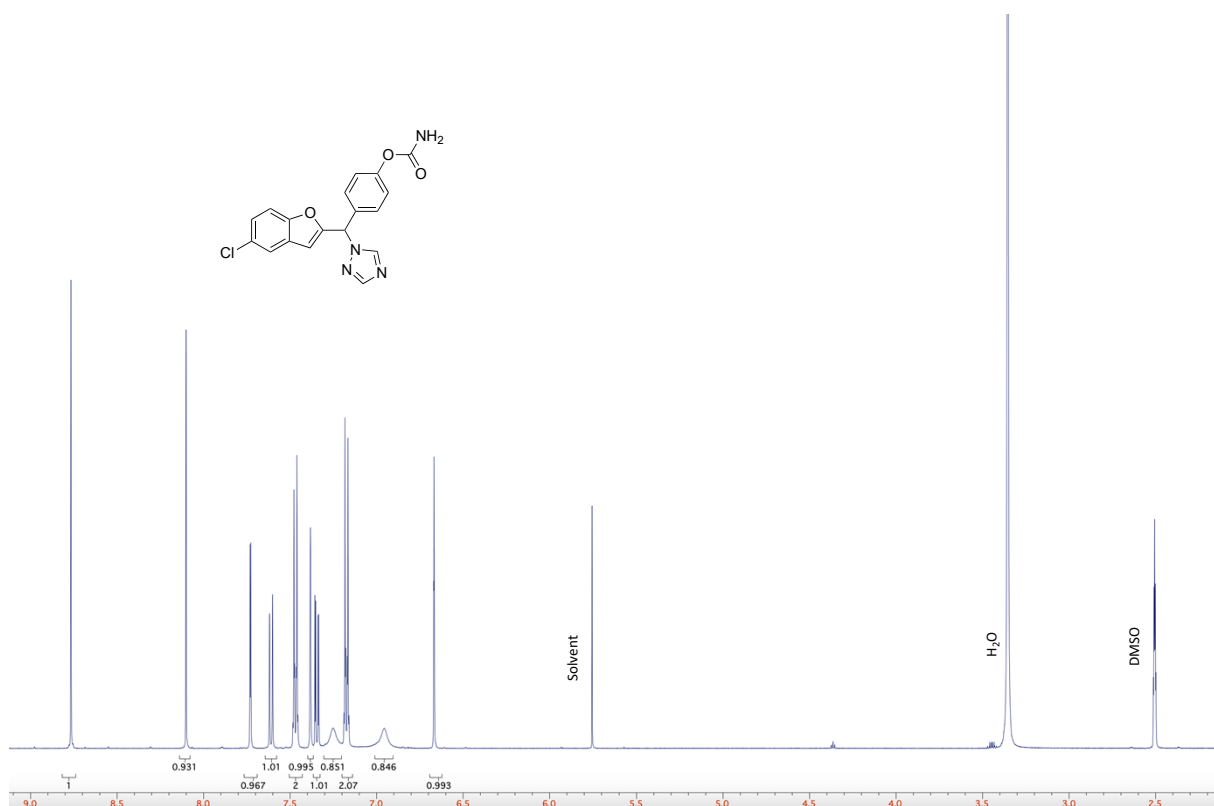

<sup>13</sup>C NMR (CDCl<sub>3</sub>)

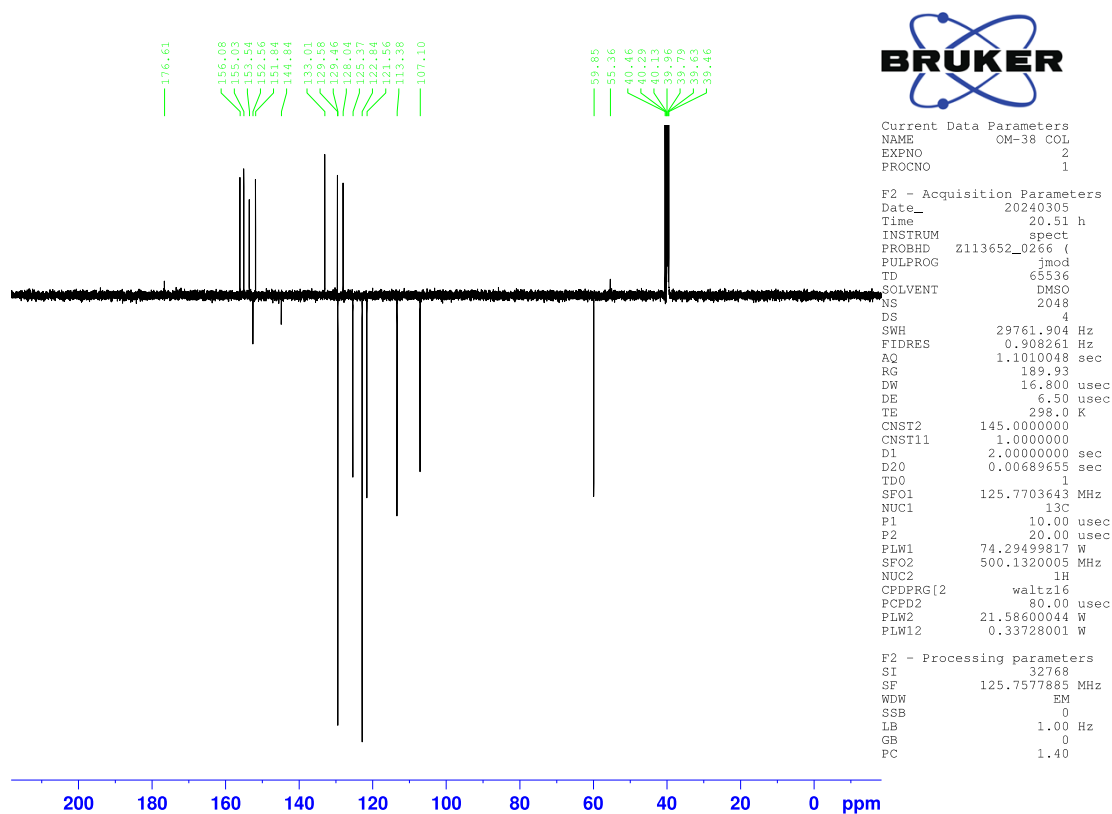

HPLC

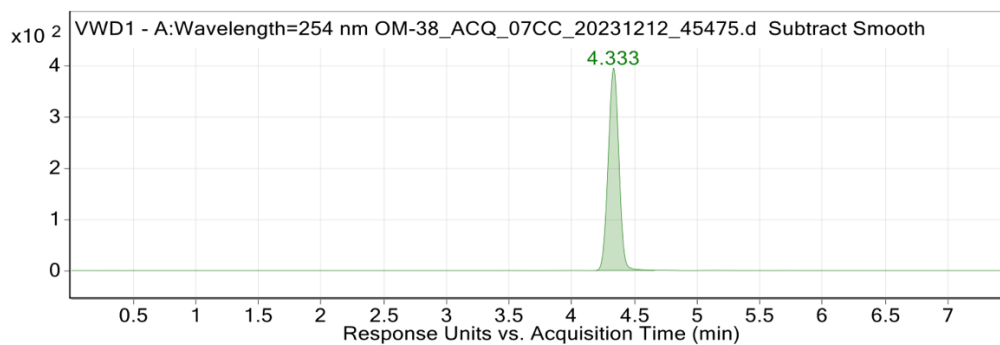

Figure: Base peak or HPLC chromatogram (indicated in left hand corner)

User Chromatogram Peak List

| RT (min) | Area    | Area % | Area Sum (%) | Symmetry | Width (min) |
|----------|---------|--------|--------------|----------|-------------|
| 4.33     | 2354.83 | 100.00 | 100.00       | 1.02     | 0.467       |



# Compound 9

<sup>1</sup>H NMR (DMSO-d<sub>6</sub>)

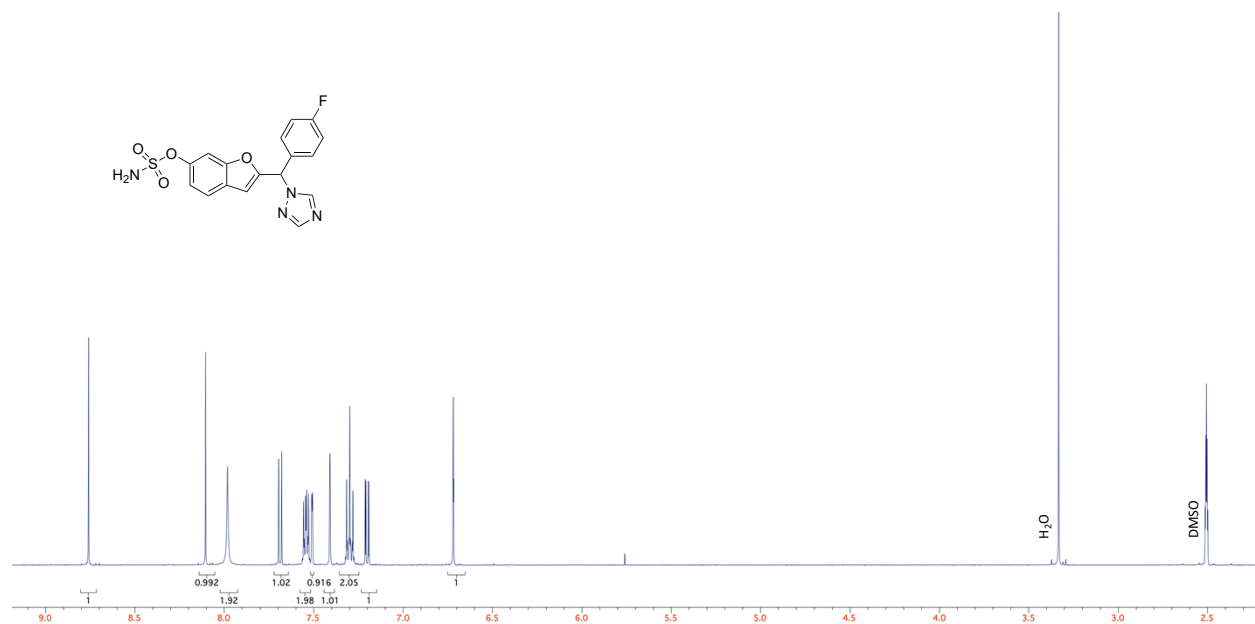

<sup>13</sup>C NMR (DMSO-d<sub>6</sub>)

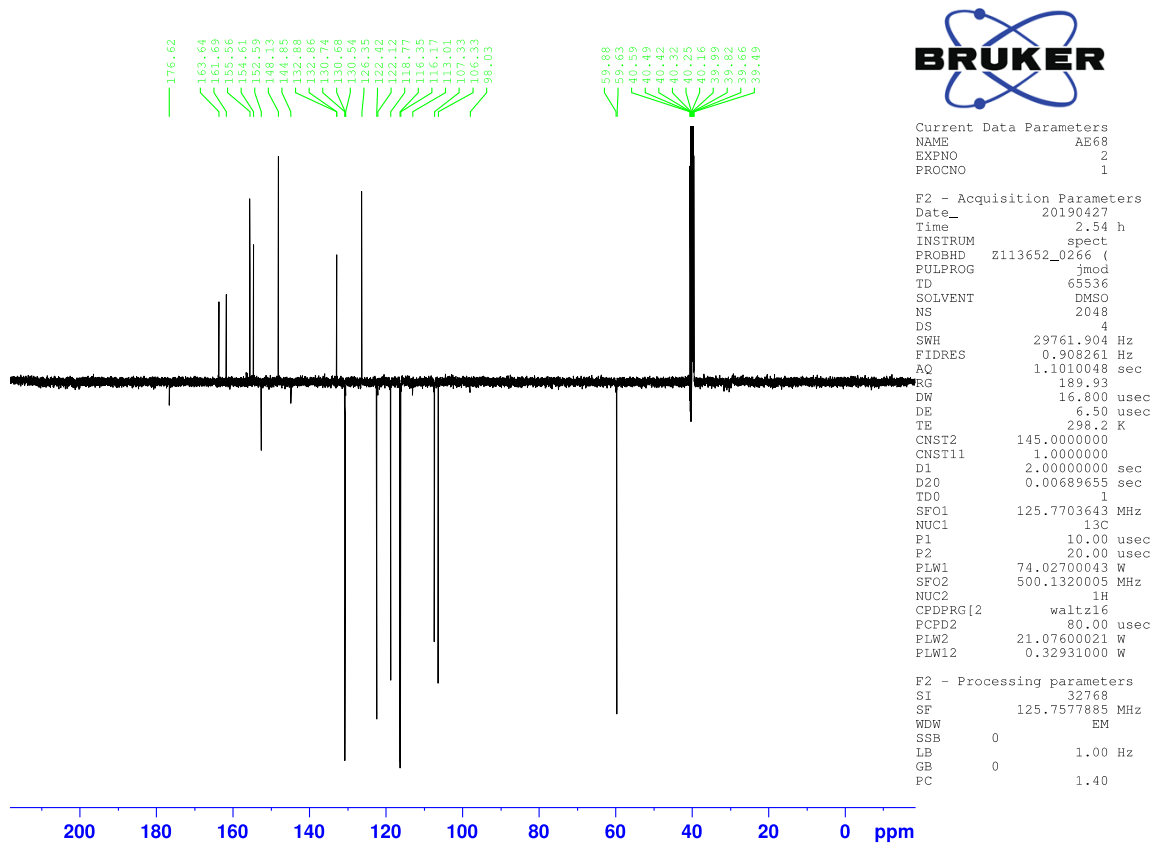

## HPLC

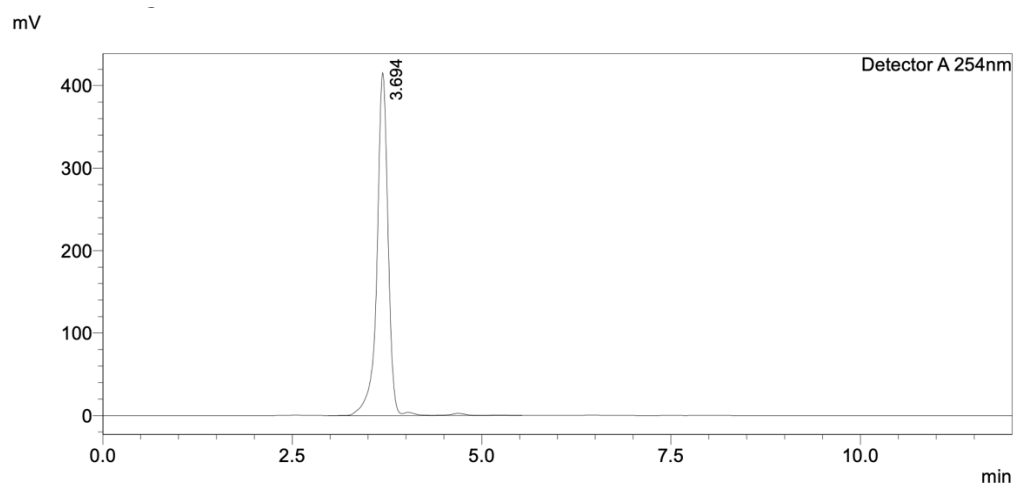

### <Peak Table>

| Peak# | Ret. Time | Area    | Height | Conc.   | Area%   |
|-------|-----------|---------|--------|---------|---------|
| 1     | 3.694     | 4250048 | 415523 | 100.000 | 100.000 |
| Total |           | 4250048 | 415523 |         | 100.000 |

## Compound 10a

$^1\text{H}$  NMR ( $\text{DMSO}-d_6$ )

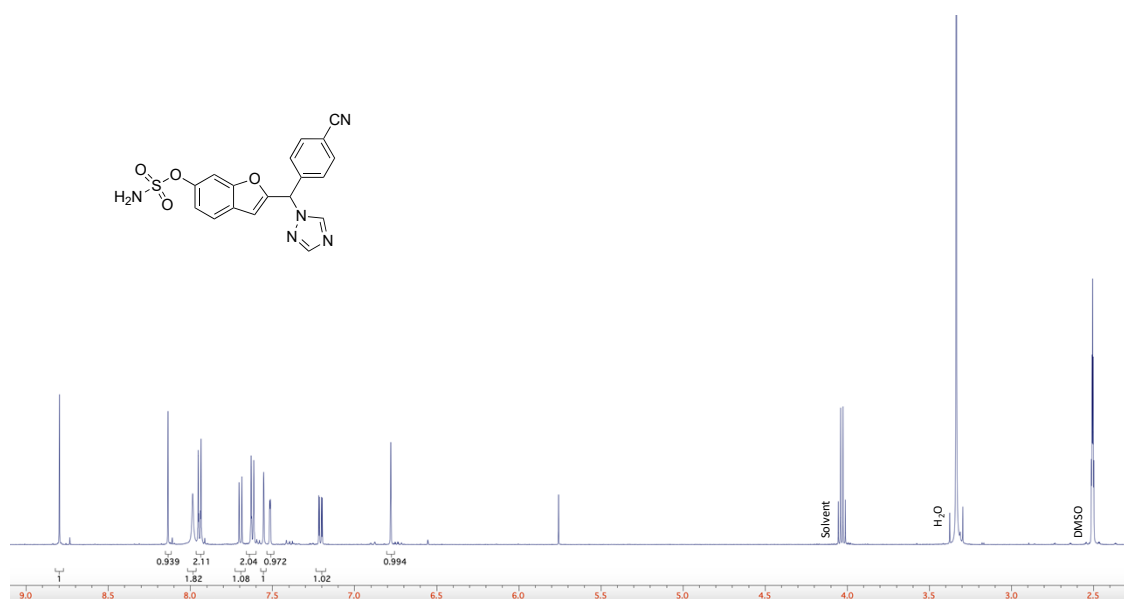

<sup>13</sup>C NMR (DMSO-d<sub>6</sub>)

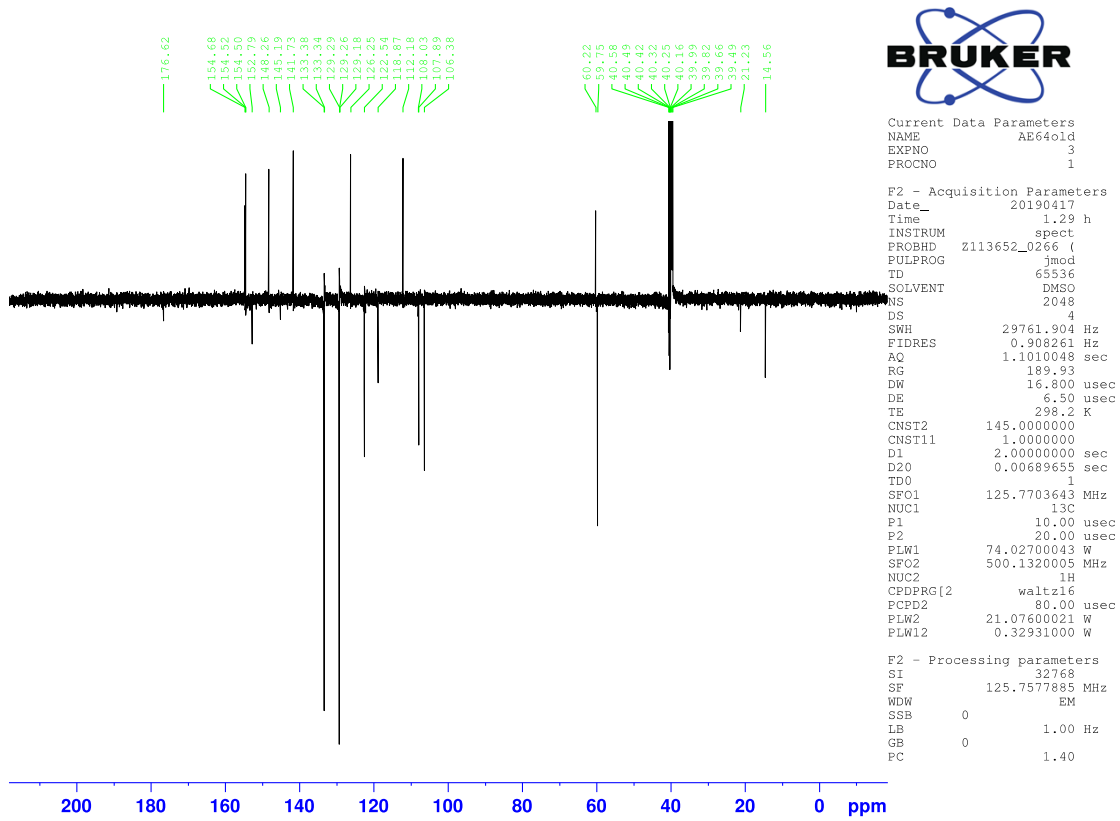

HPLC

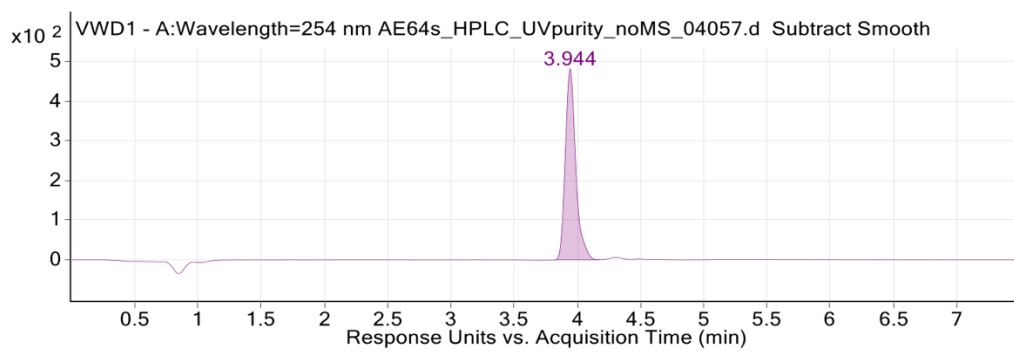

Figure: Base peak or HPLC chromatogram (indicated in left hand corner)

User Chromatogram Peak List

| RT (min) | Area    | Area % | Area Sum (%) | Symmetry | Width (min) |
|----------|---------|--------|--------------|----------|-------------|
| 3.94     | 2777.07 | 100.00 | 100.00       | 1.43     | 0.352       |

Compound **10b**

$^1\text{H}$  NMR ( $\text{DMSO-}d_6$ )

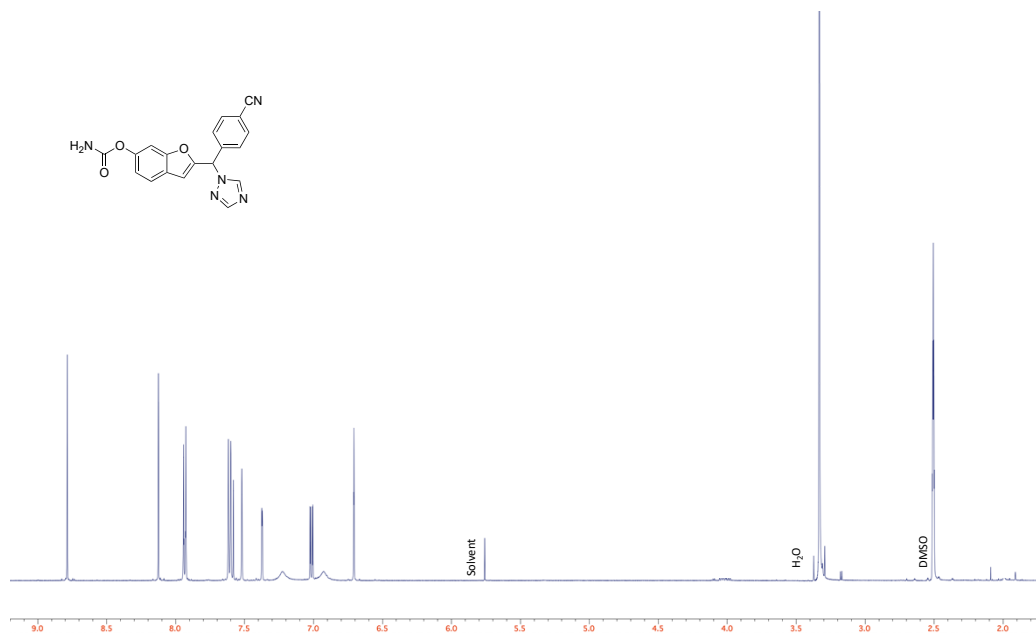

$^{13}\text{C}$  NMR ( $\text{DMSO-}d_6$ )

## HPLC

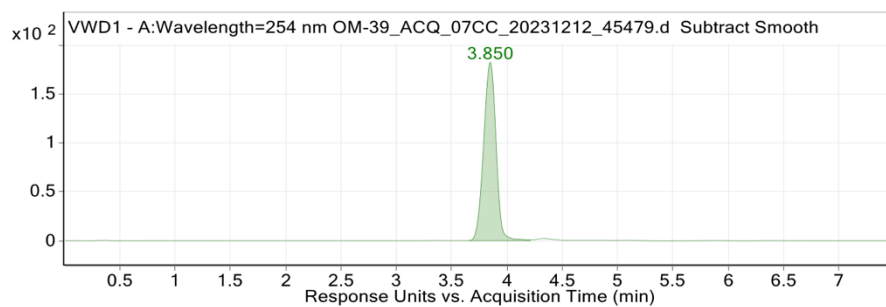

### User Chromatogram Peak List

| RT (min) | Area    | Area % | Area Sum (%) | Symmetry | Width (min) |
|----------|---------|--------|--------------|----------|-------------|
| 3.85     | 1427.25 | 100.00 | 100.00       | 0.85     | 0.553       |

## Compound 18a

$^1\text{H}$  NMR (DMSO- $d_6$ )

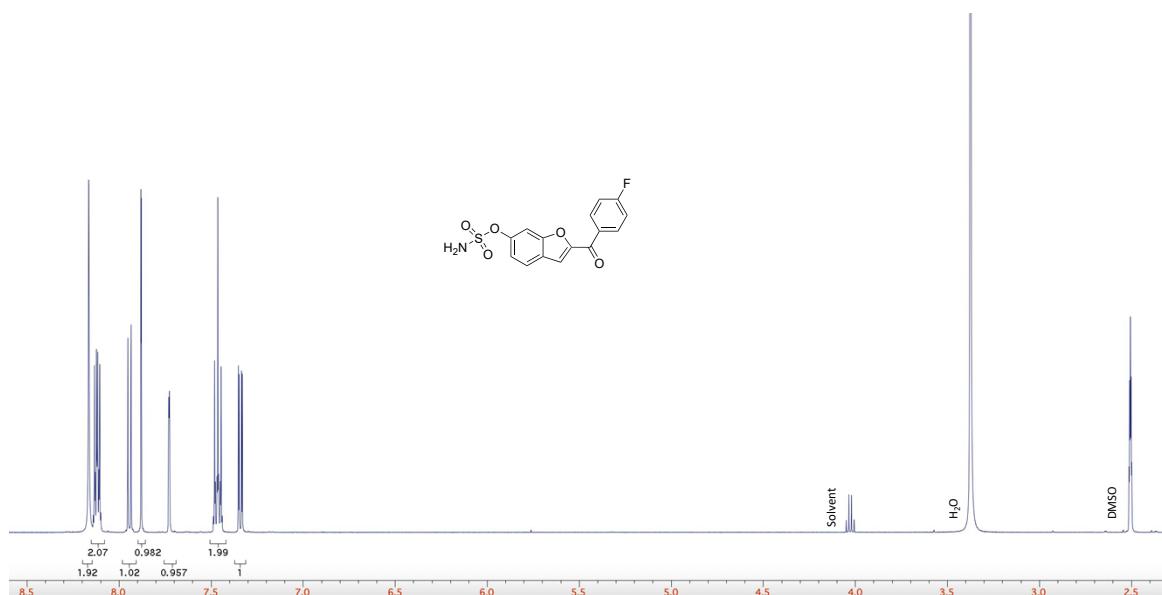

<sup>13</sup>C NMR (DMSO-d<sub>6</sub>)

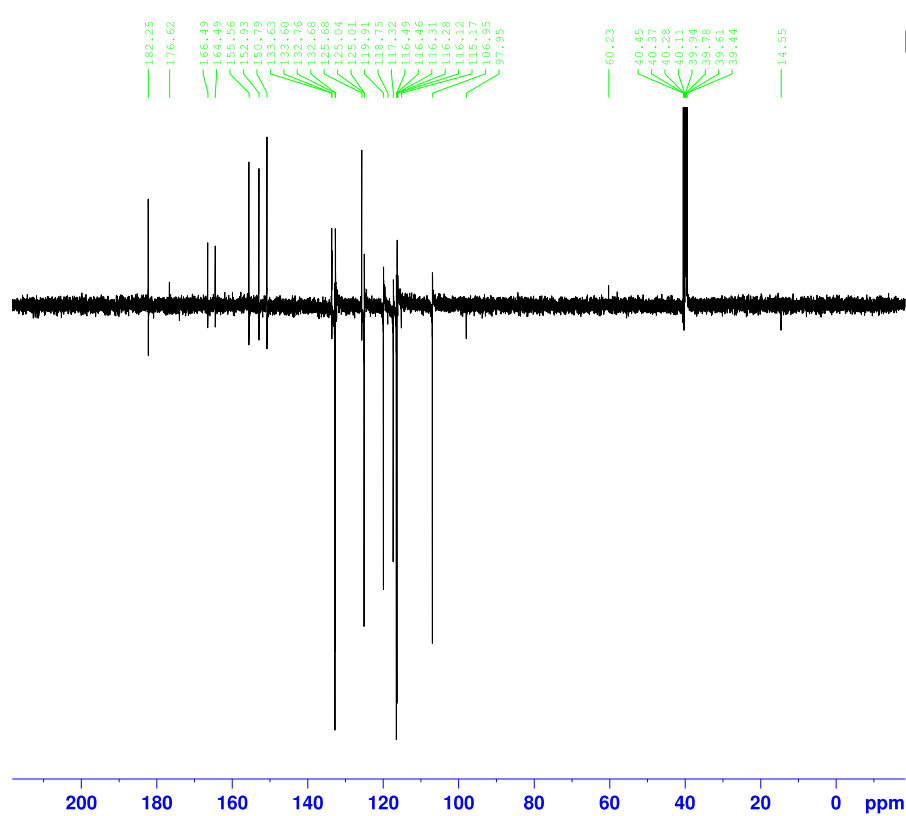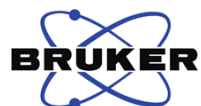

Current Data Parameters  
 NAME CS6-53C  
 EXPNO 1  
 PROCNO 1

F2 - Acquisition Parameters  
 Date\_ 20230913  
 Time 22.42 h  
 INSTRUM spect  
 PROBHD Z113652\_0266 (  
 PULPROG jmod  
 TD 65536  
 SOLVENT DMSO  
 NS 1024  
 DS 4  
 SWH 29761.904 Hz  
 FIDRES 0.908261 Hz  
 AQ 1.1010048 sec  
 RG 189.93  
 DW 16.800 usec  
 DE 6.50 usec  
 TE 295.4 K  
 CNST2 145.0000000  
 CNST11 1.0000000  
 D1 2.0000000 sec  
 D20 0.00689655 sec  
 TD0 1  
 SFO1 125.7703643 MHz  
 NUC1 13C  
 P1 10.00 usec  
 P2 20.00 usec  
 PLW1 74.29499817 W  
 SFO2 500.1320005 MHz  
 NUC2 1H  
 CPDPRG[2] waltz16  
 PCPD2 80.00 usec  
 PLW2 21.58600044 W  
 PLW12 0.33728001 W

F2 - Processing parameters  
 SI 32768  
 SF 125.7577885 MHz  
 WDW EM  
 SSB 0  
 LB 1.00 Hz  
 GB 0  
 PC 1.40

<sup>19</sup>F NMR

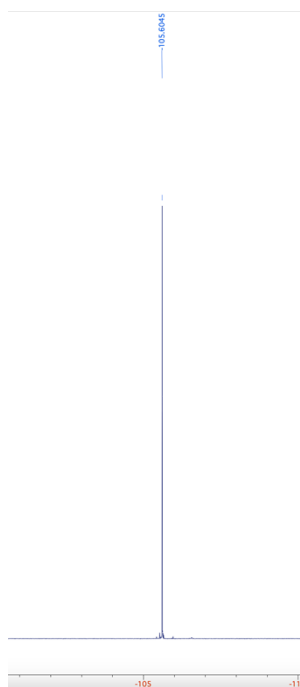

# Compound 18b

<sup>1</sup>H NMR (DMSO-*d*<sub>6</sub>)

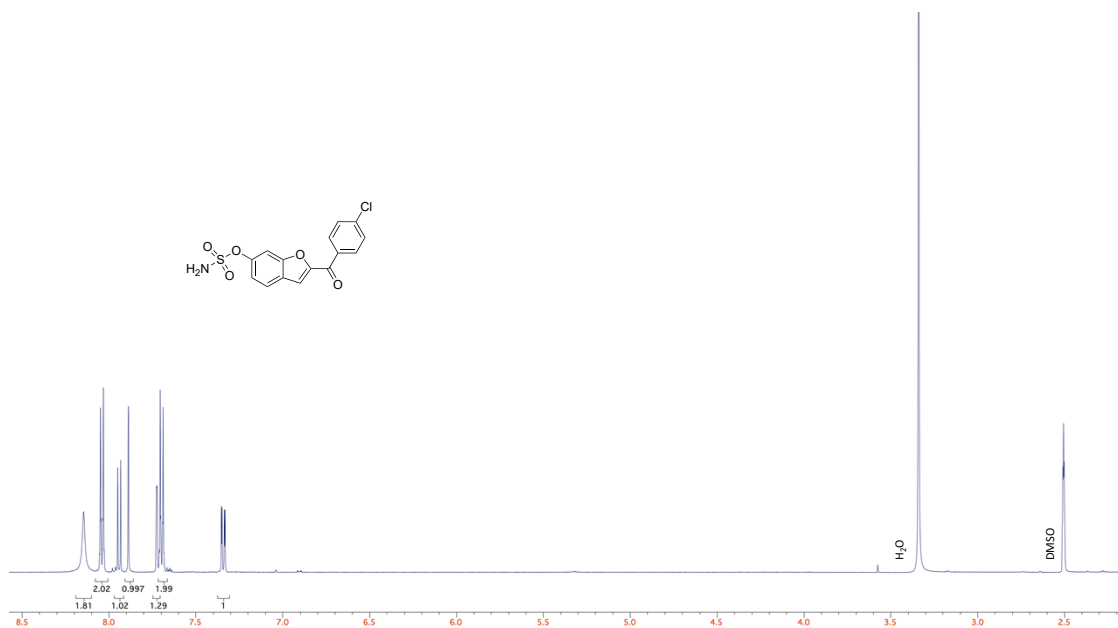

<sup>13</sup>C NMR (DMSO-*d*<sub>6</sub>)

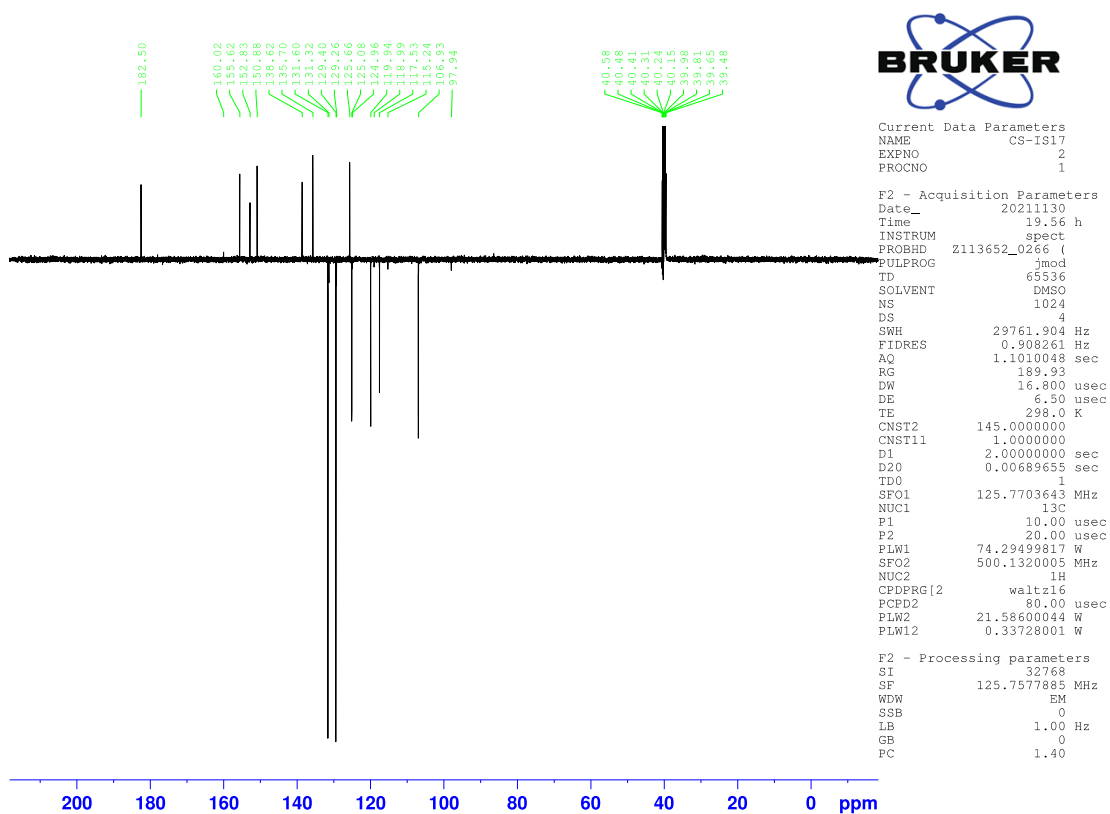

# Compound 18c

<sup>1</sup>H NMR (DMSO-d<sub>6</sub>)

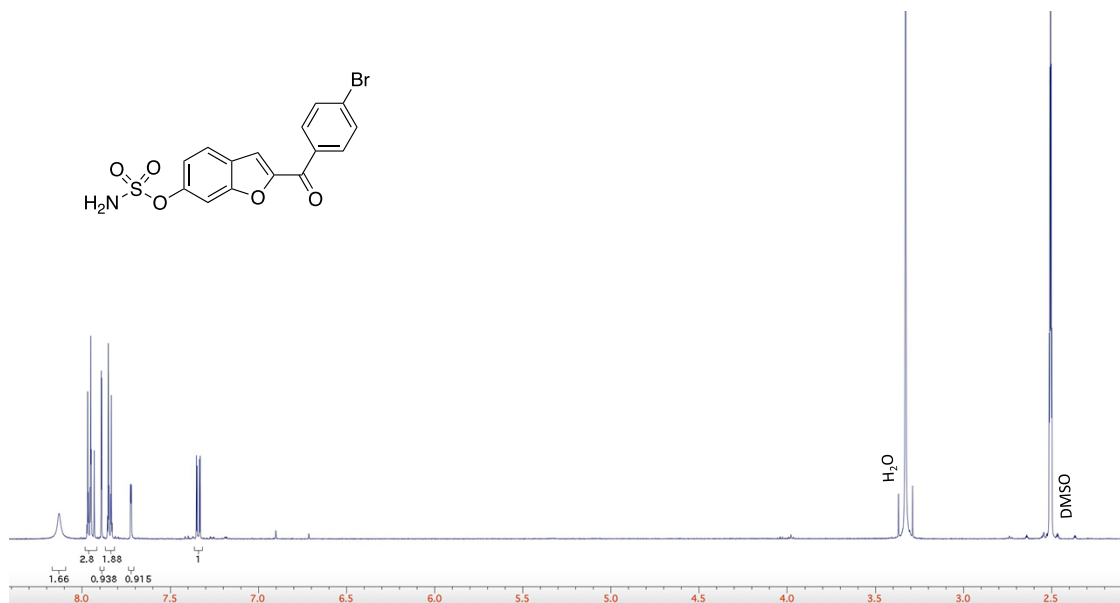

<sup>13</sup>C NMR (DMSO-d<sub>6</sub>)

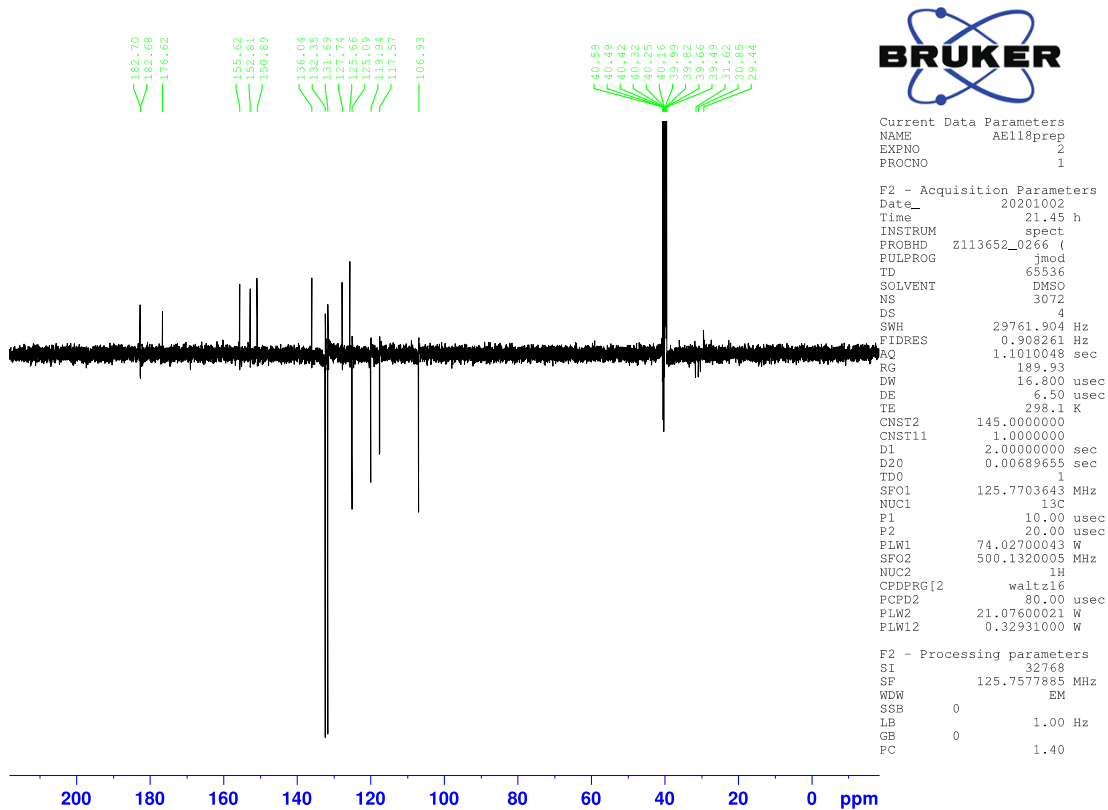



# HPLC

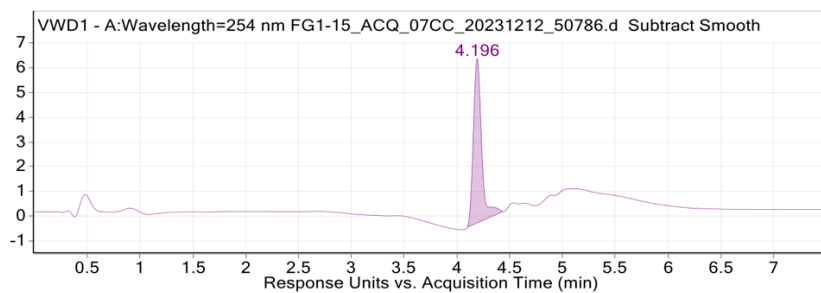

Figure: Base peak or HPLC chromatogram (indicated in left hand corner)

### User Chromatogram Peak List

| RT (min) | Area  | Area % | Area Sum (%) | Symmetry | Width (min) |
|----------|-------|--------|--------------|----------|-------------|
| 4.20     | 36.13 | 100.00 | 100.00       | 1.35     | 0.338       |

## Compound 18d

$^1\text{H}$  NMR (DMSO- $d_6$ )

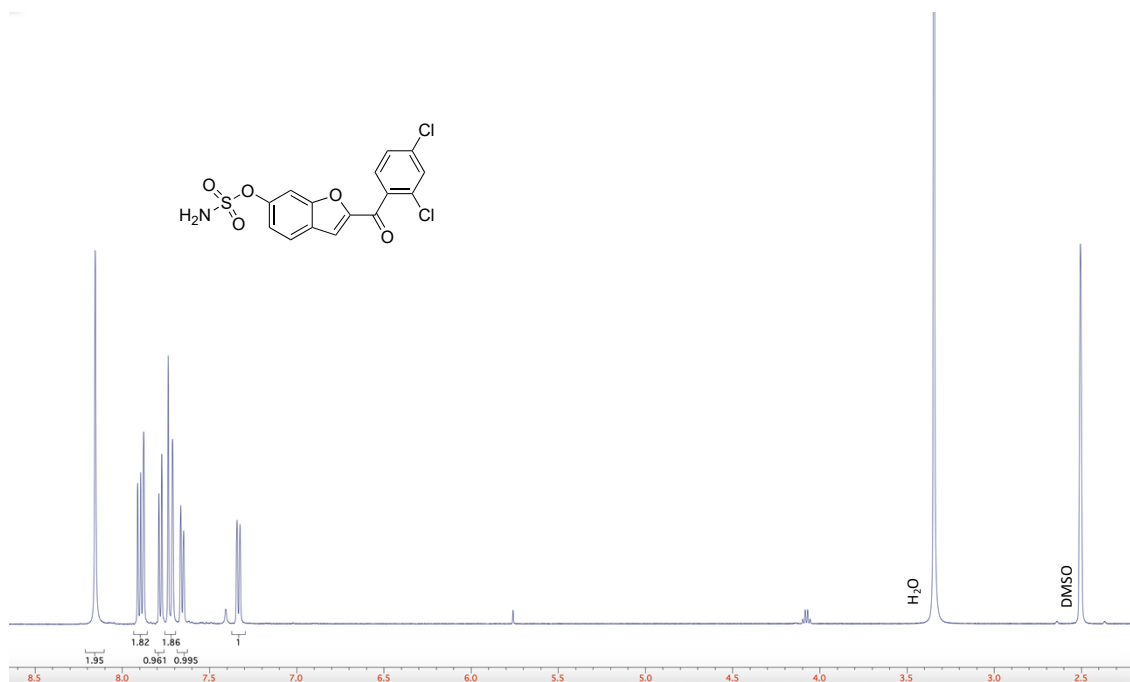

# <sup>13</sup>C NMR (DMSO-d<sub>6</sub>)

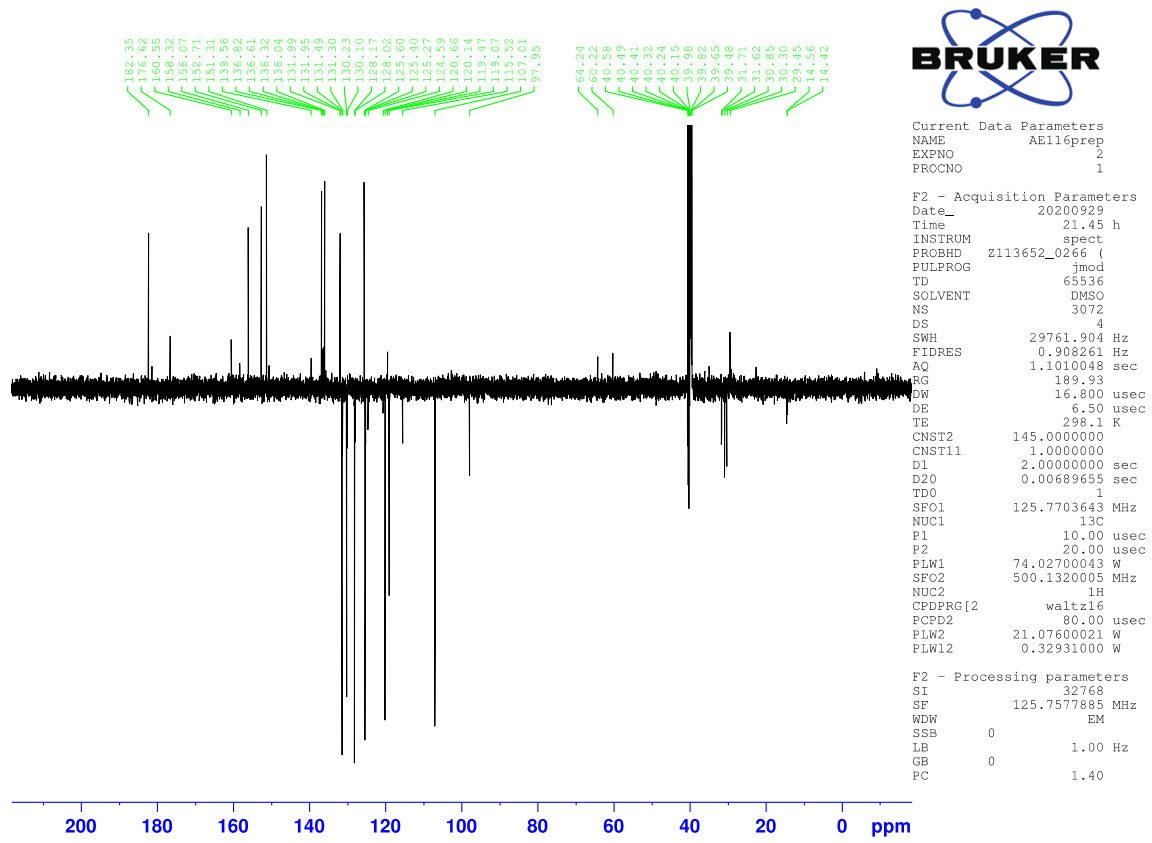

# Compound 18e

## <sup>1</sup>H NMR (DMSO-d<sub>6</sub>)

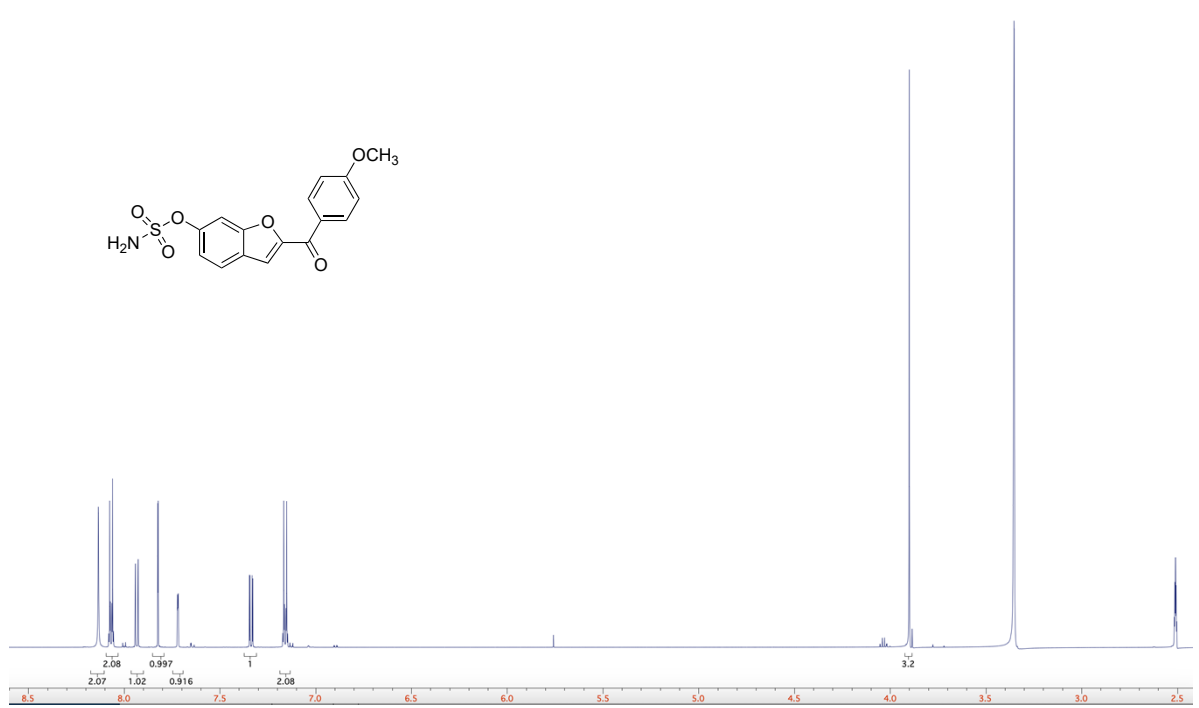

<sup>13</sup>C NMR (DMSO-d<sub>6</sub>)

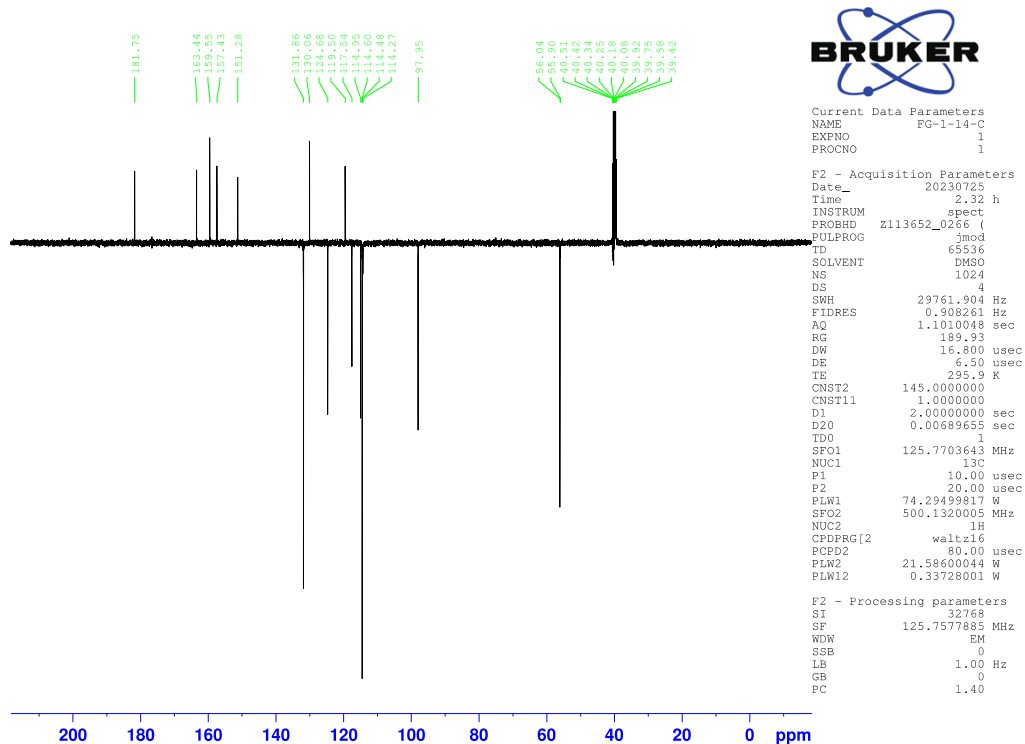

HPLC

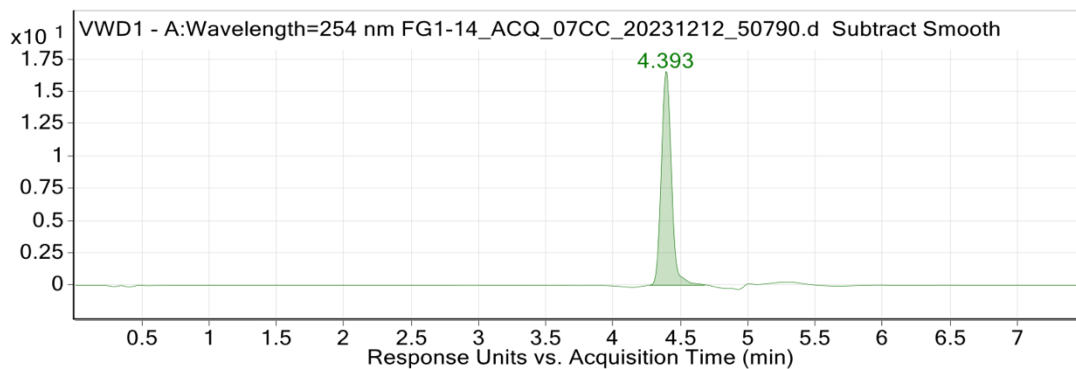

Figure: Base peak or HPLC chromatogram (indicated in left hand corner)

User Chromatogram Peak List

| RT (min) | Area  | Area % | Area Sum (%) | Symmetry | Width (min) |
|----------|-------|--------|--------------|----------|-------------|
| 4.39     | 87.25 | 100.00 | 100.00       | 1.18     | 0.400       |

Compound 18f

<sup>1</sup>H NMR (DMSO-d<sub>6</sub>)

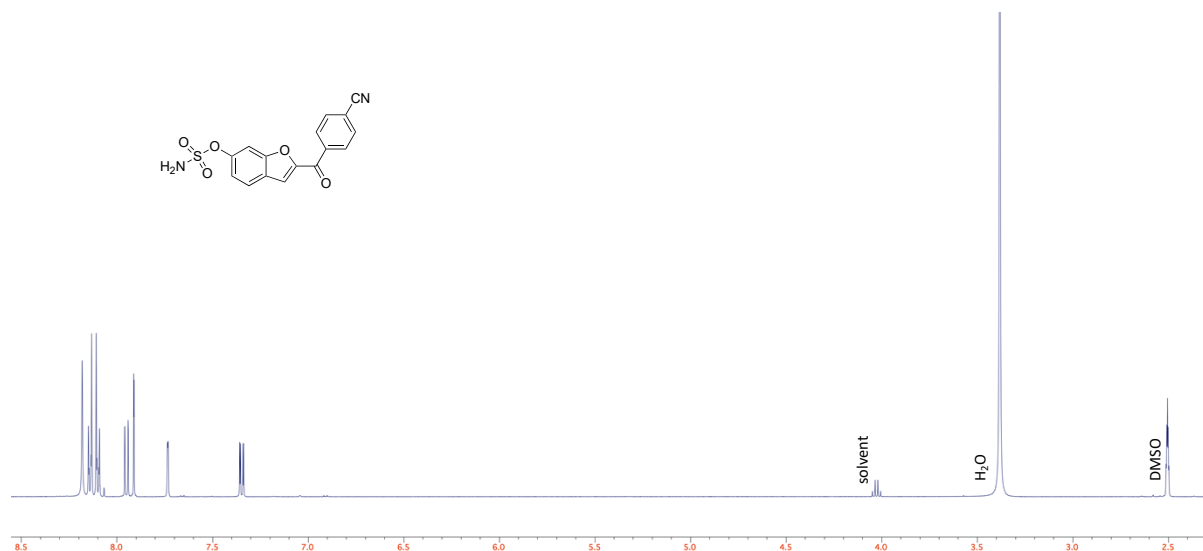

<sup>13</sup>C NMR (DMSO-d<sub>6</sub>)

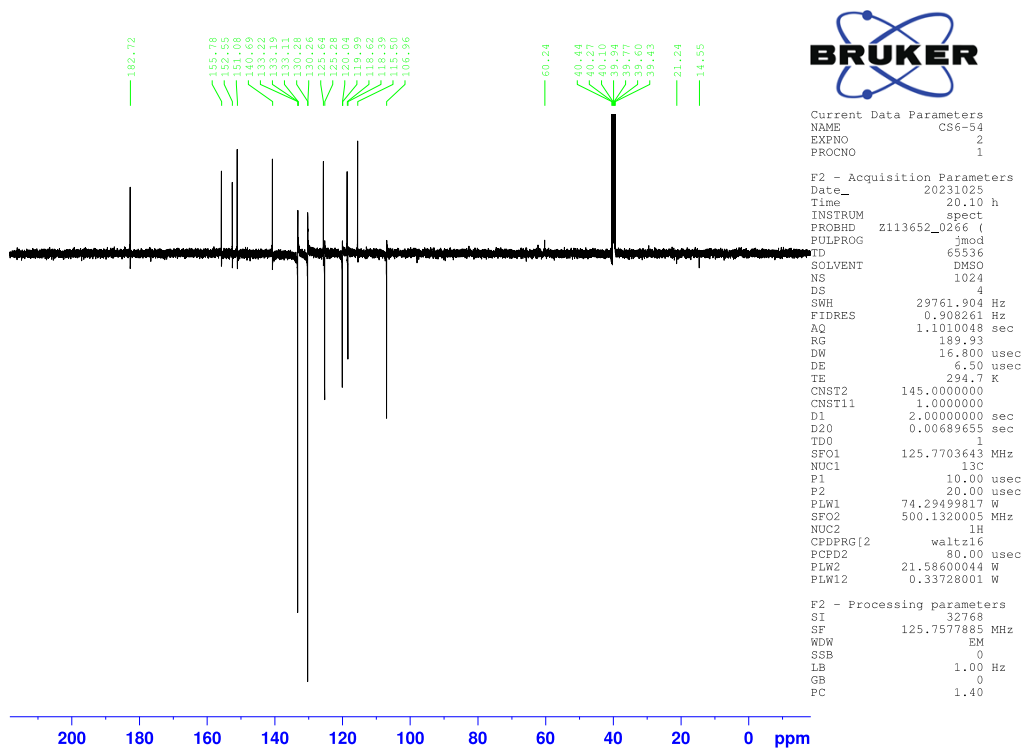

HPLC

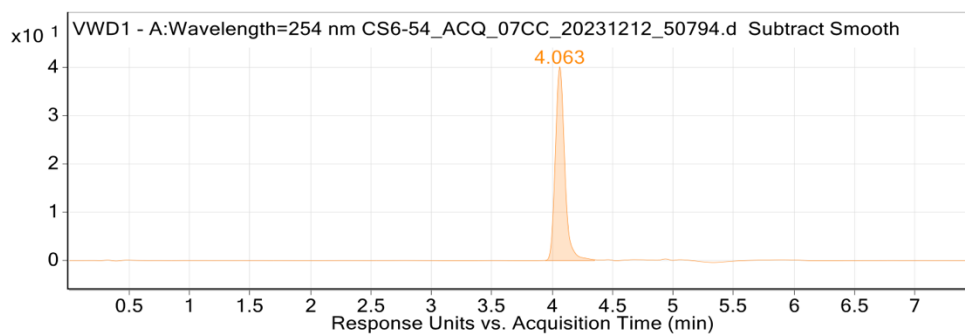

Figure: Base peak or HPLC chromatogram (indicated in left hand corner)

**User Chromatogram Peak List**

| RT (min) | Area   | Area % | Area Sum (%) | Symmetry | Width (min) |
|----------|--------|--------|--------------|----------|-------------|
| 4.06     | 217.89 | 100.00 | 100.00       | 1.23     | 0.407       |

**Compound 19a**

<sup>1</sup>H NMR (DMSO-*d*<sub>6</sub>)

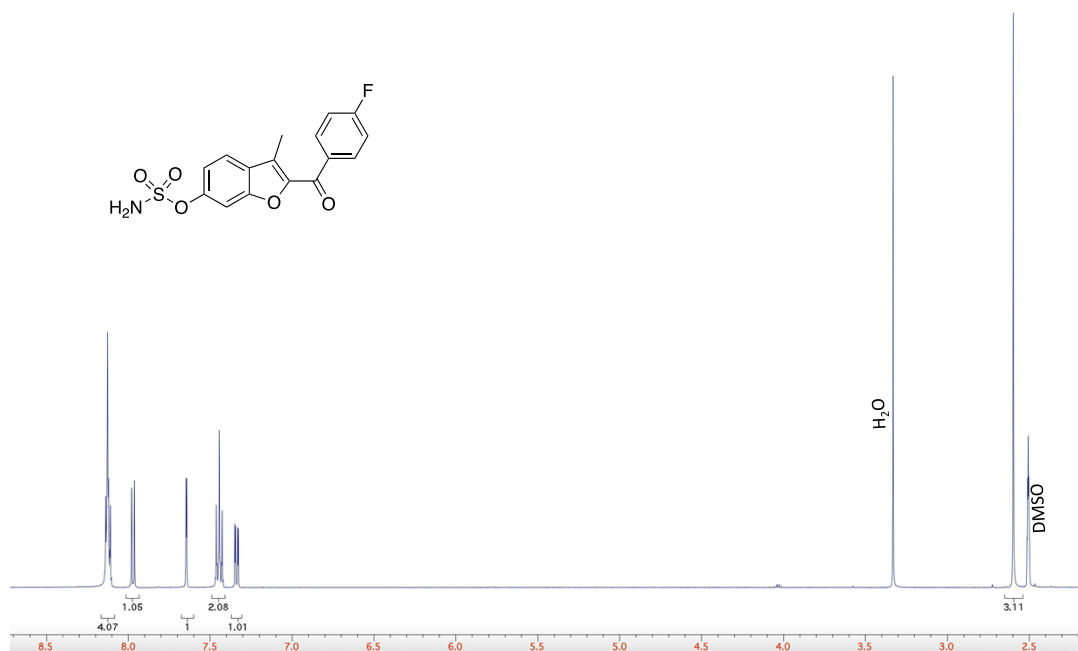

<sup>13</sup>C NMR (DMSO-d<sub>6</sub>)

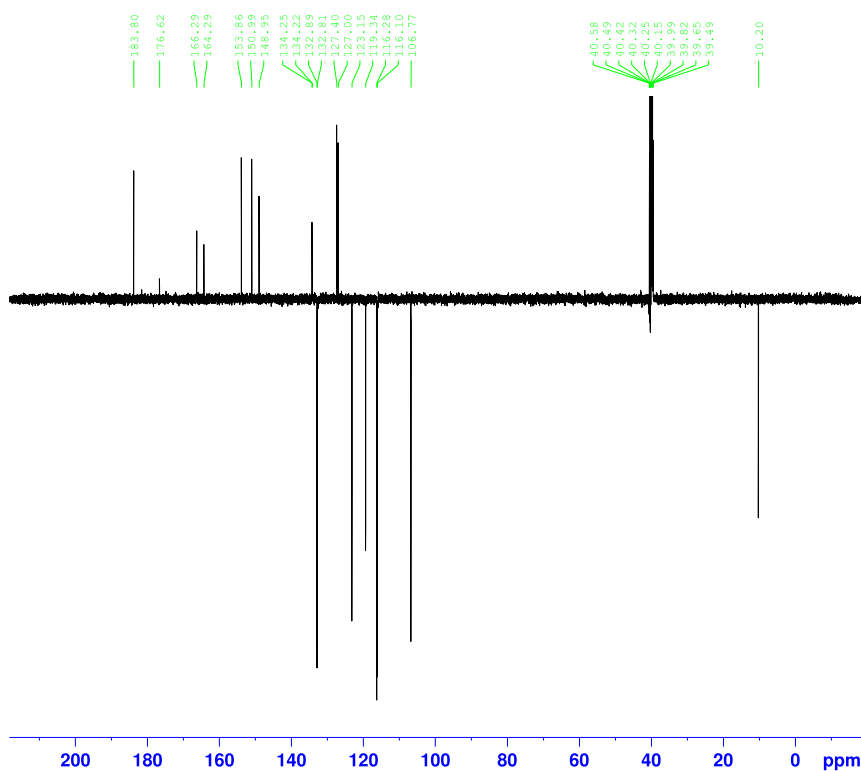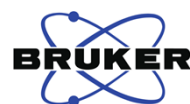

Current Data Parameters  
 NAME CS-IS14  
 EXPNO 3  
 PROCNO 1

F2 - Acquisition Parameters  
 Date\_ 20211123  
 Time 19:57 h  
 INSTRUM spect  
 PROBHD Z113652\_0266 (  
 PULPROG jmod  
 TD 65536  
 SOLVENT DMSO  
 NS 1024  
 DS 4  
 SWH 29761.904 Hz  
 FIDRES 0.908261 Hz  
 AQ 1.1010048 sec  
 RG 189.93  
 DW 16.800 usec  
 DE 6.50 usec  
 TE 298.0 K  
 CNST2 145.000000  
 CNST11 1.000000  
 D1 2.0000000 sec  
 D20 0.00689655 sec  
 TD0 1  
 SFO1 125.7703643 MHz  
 NUC1 13C  
 P1 10.00 usec  
 P2 20.00 usec  
 PLW1 74.29499817 W  
 SFO2 500.1320005 MHz  
 NUC2 1H  
 CPDPRG2 waltz16  
 PCPD2 80.00 usec  
 PLW2 21.58600044 W  
 PLW12 0.33728001 W

F2 - Processing parameters  
 SI 32768  
 SF 125.7577885 MHz  
 WDW EM  
 SSB 0  
 LB 1.00 Hz  
 GB 0  
 PC 1.40

<sup>19</sup>F NMR (DMSO-d<sub>6</sub>)

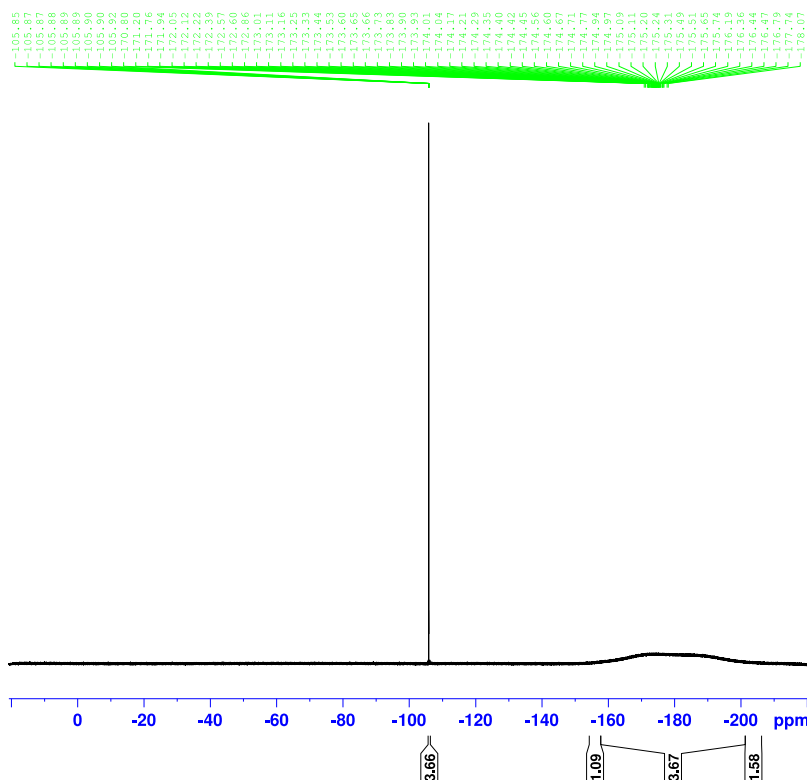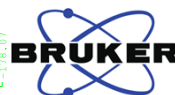

Current Data Parameters  
 NAME CS-IS14  
 EXPNO 2  
 PROCNO 1

F2 - Acquisition Parameters  
 Date\_ 20211123  
 Time 17:05 h  
 INSTRUM spect  
 PROBHD Z113652\_0266 (  
 PULPROG zgfg1q  
 TD 262144  
 SOLVENT DMSO  
 NS 16  
 DS 4  
 SWH 113636.367 Hz  
 FIDRES 0.866977 Hz  
 AQ 1.1534336 sec  
 RG 189.93  
 DW 4.400 usec  
 DE 7.20 usec  
 TE 298.0 K  
 D1 1.00000000 sec  
 TD0 1  
 SFO1 470.5453180 MHz  
 NUC1 19F  
 P1 15.00 usec  
 PLW1 59.30899811 W

F2 - Processing parameters  
 SI 262144  
 SF 470.5923772 MHz  
 WDW EM  
 SSB 0  
 LB 0.30 Hz  
 GB 0  
 PC 1.00

# Compound 19b

<sup>1</sup>H NMR (DMSO-d<sub>6</sub>)

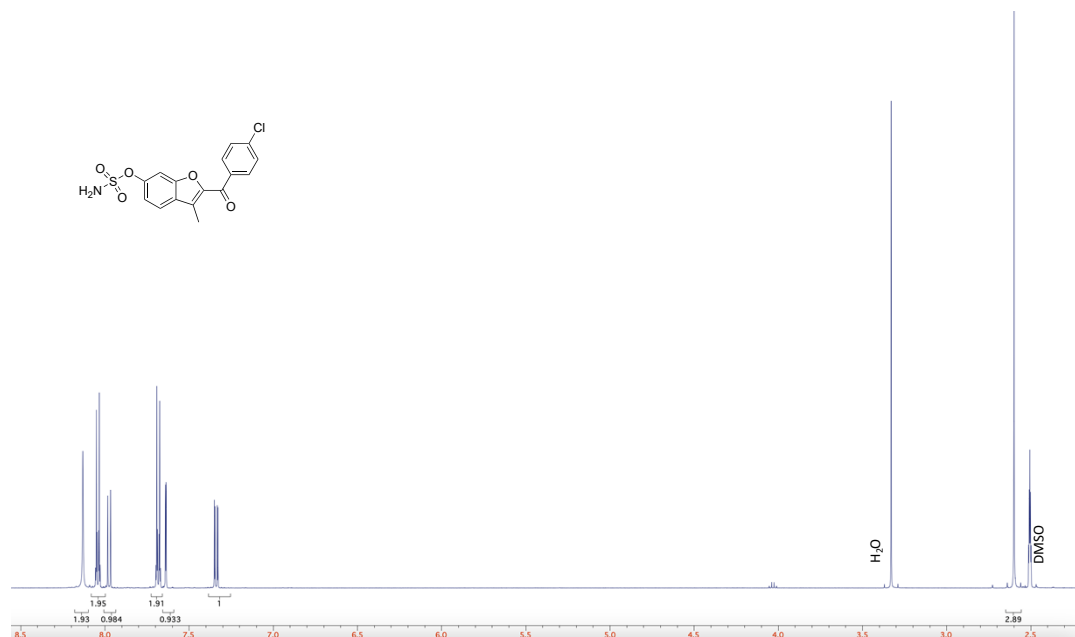

<sup>13</sup>C NMR (DMSO-d<sub>6</sub>)

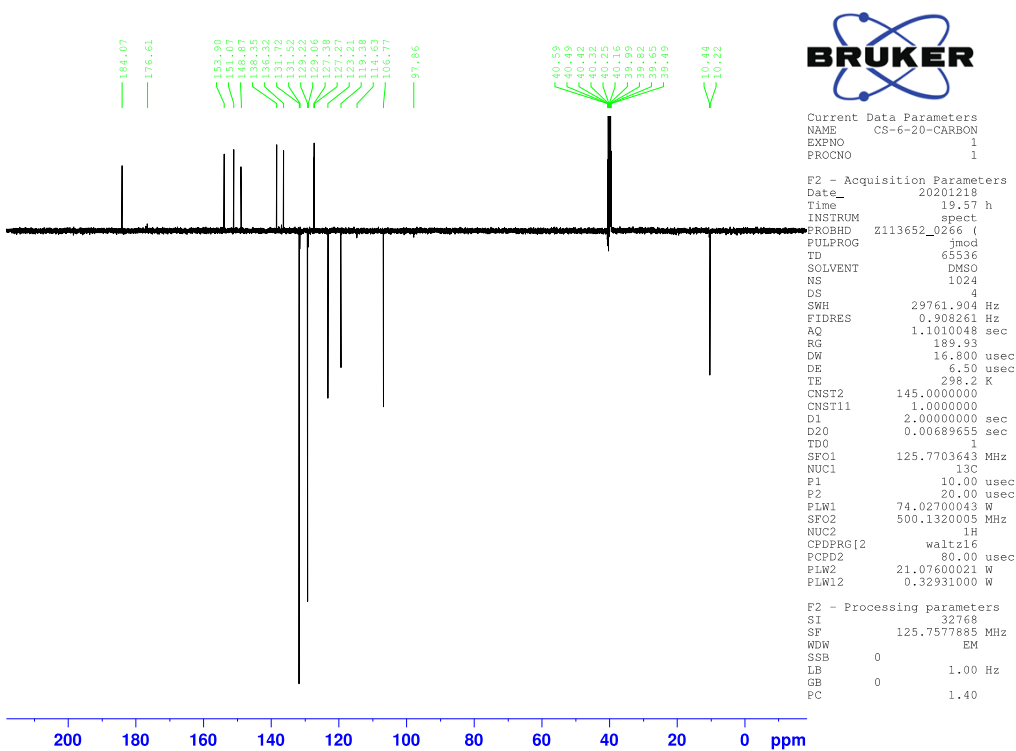

# Compound 19c

<sup>1</sup>H NMR (DMSO-d<sub>6</sub>)

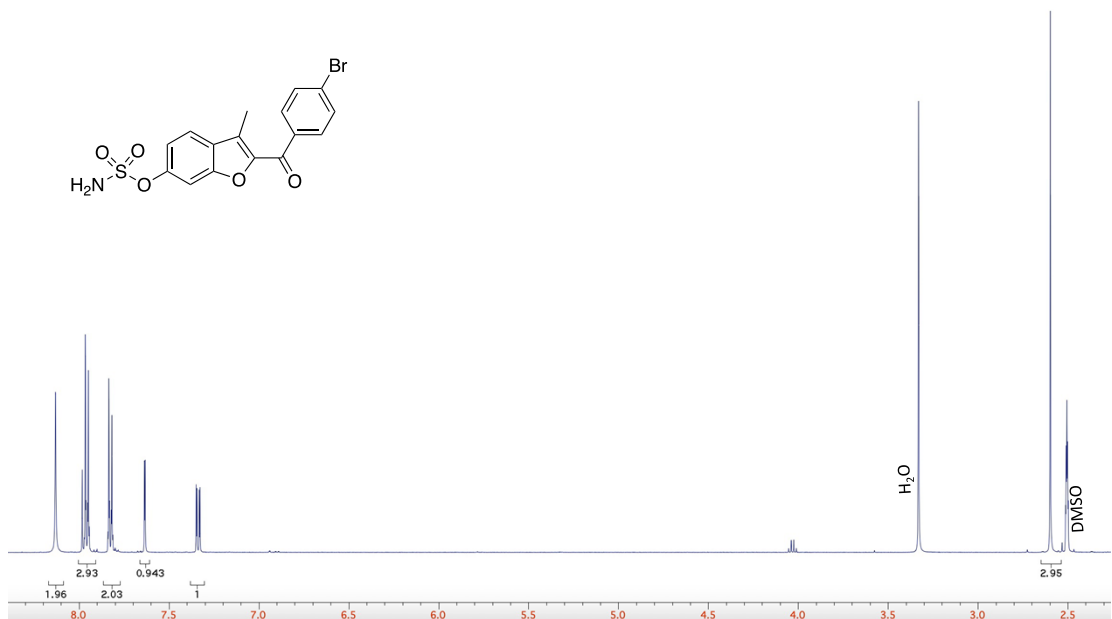

<sup>13</sup>C NMR (DMSO-d<sub>6</sub>)

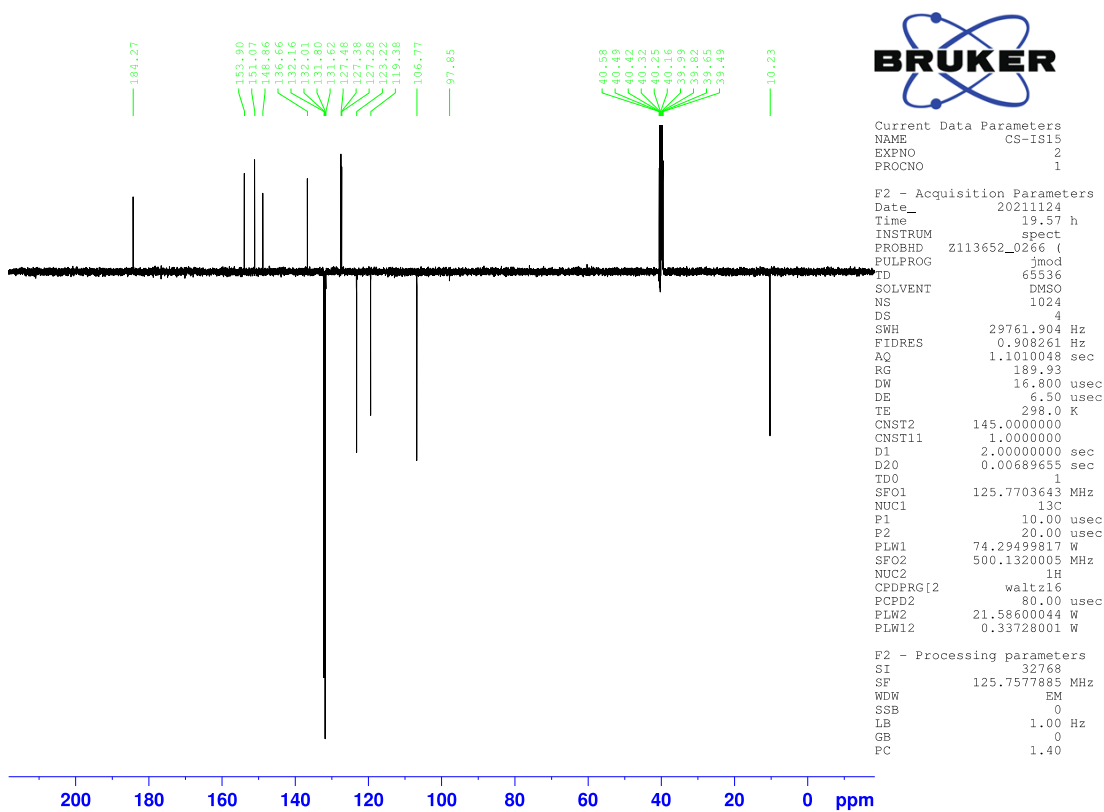



Compound **19d**

<sup>1</sup>H NMR (DMSO-d<sub>6</sub>)

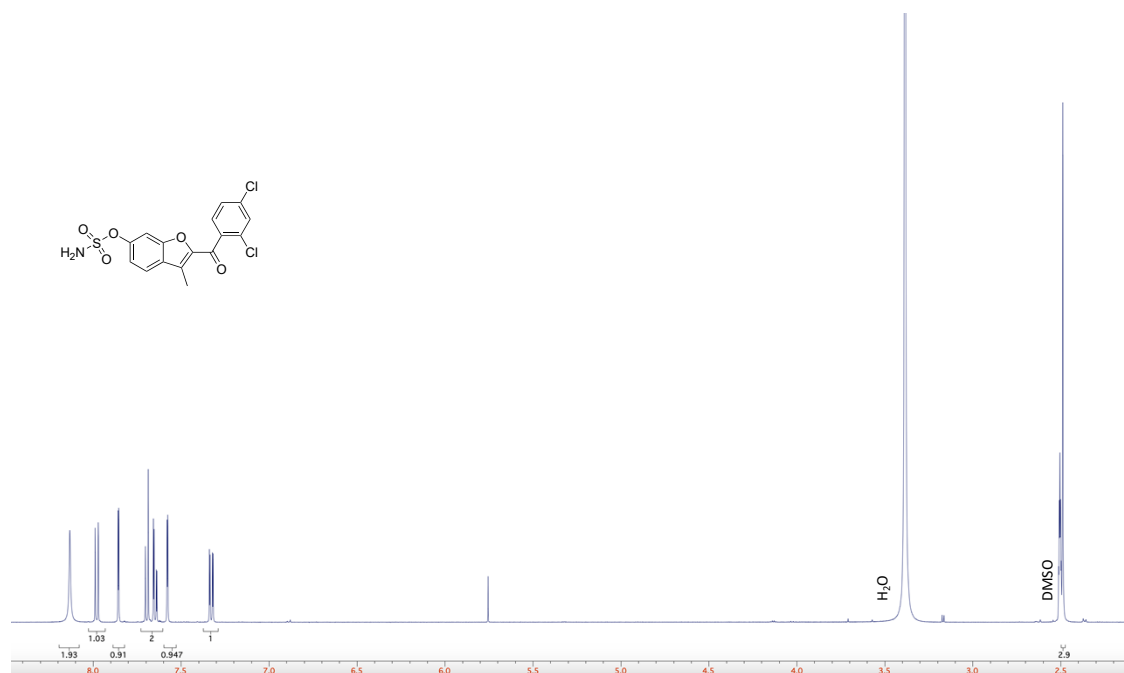

<sup>13</sup>C NMR (DMSO-d<sub>6</sub>)

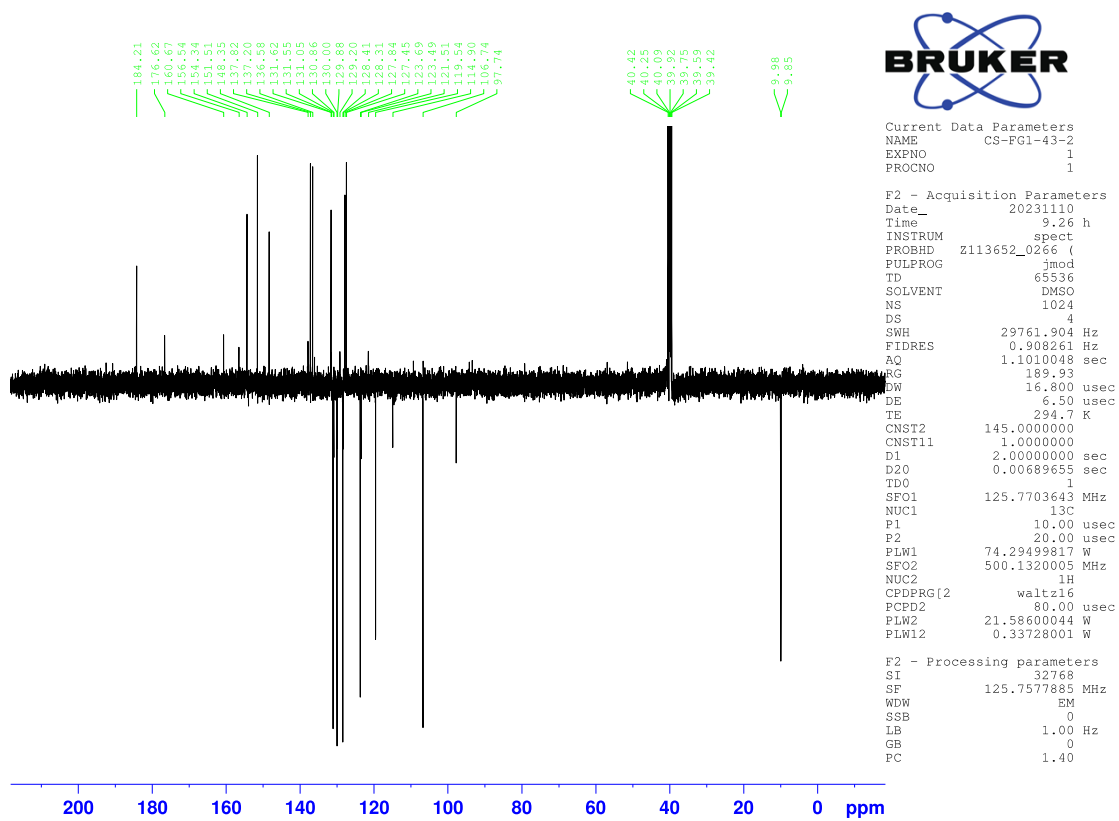

Compound **19e**

$^1\text{H}$  NMR (DMSO- $d_6$ )

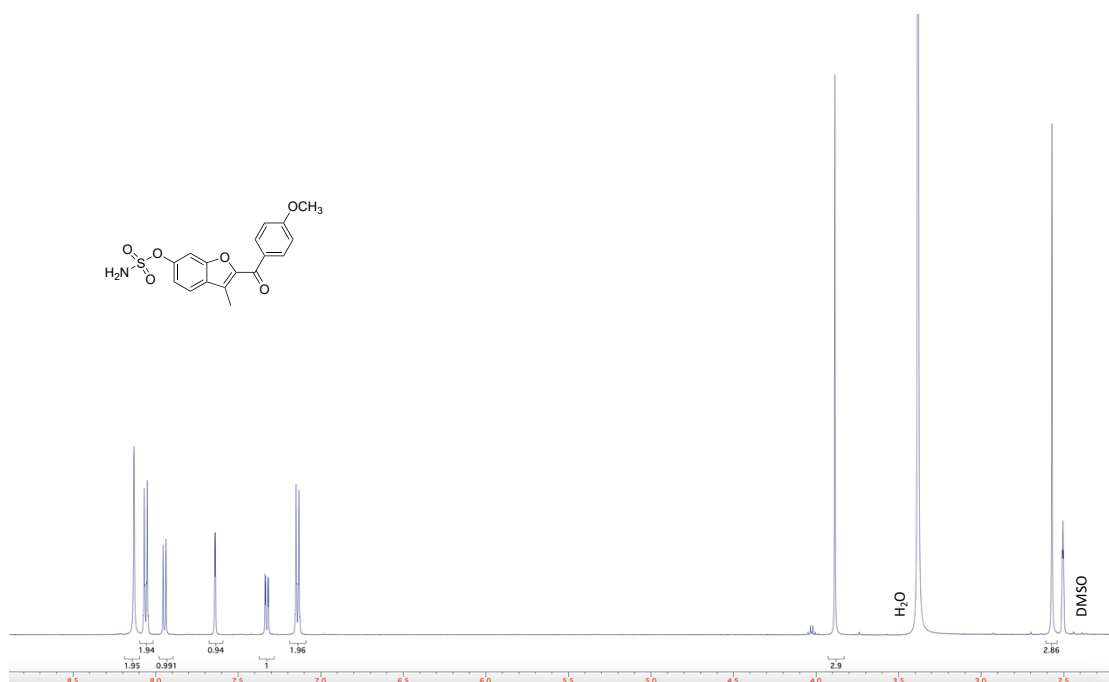

$^{13}\text{C}$  NMR (DMSO- $d_6$ )

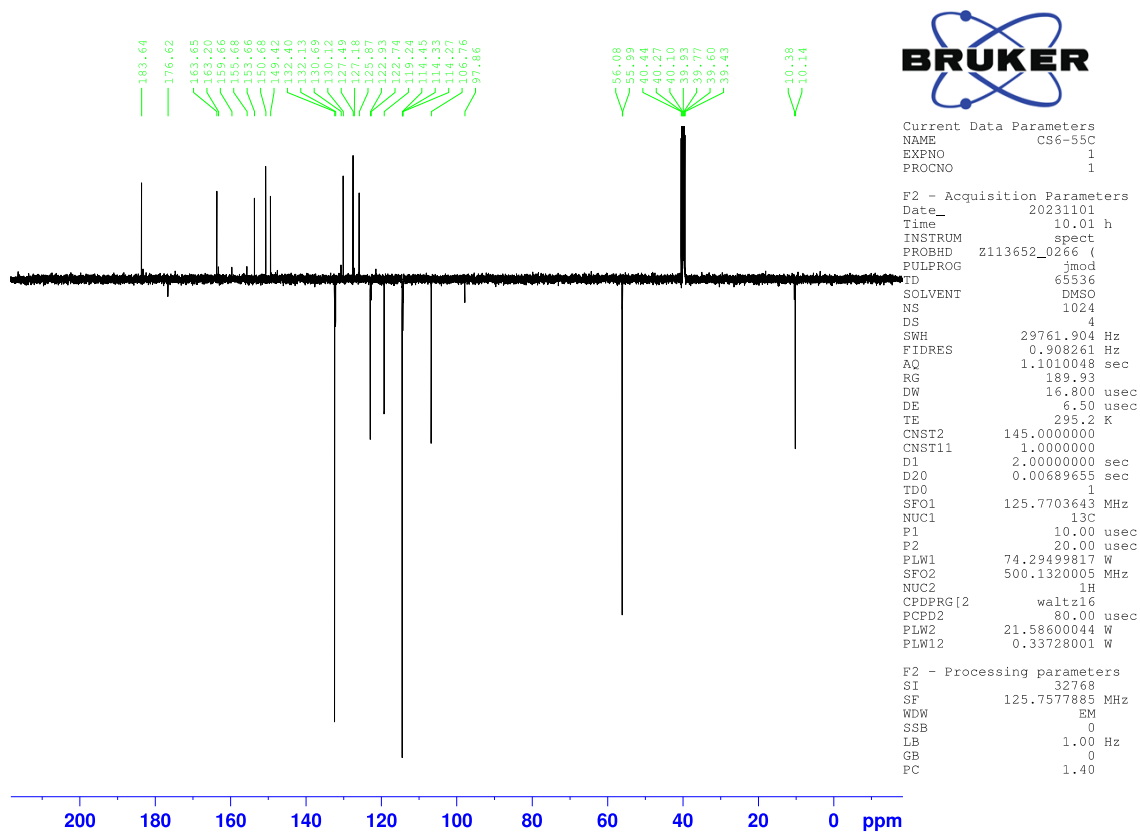

## HPLC

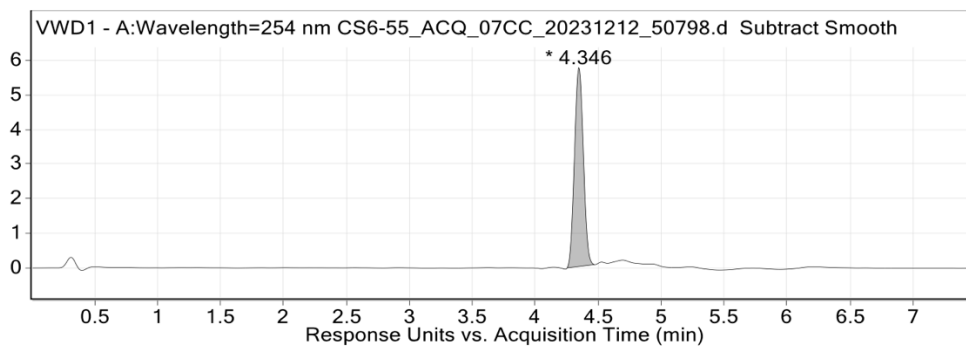

Figure: Base peak or HPLC chromatogram (indicated in left hand corner)

### User Chromatogram Peak List

| RT (min) | Area  | Area % | Area Sum (%) | Symmetry | Width (min) |
|----------|-------|--------|--------------|----------|-------------|
| 4.35     | 28.19 | 100.00 | 100.00       | 1.16     | 0.217       |

## Compound 20

$^1\text{H}$  NMR ( $\text{DMSO}-d_6$ )

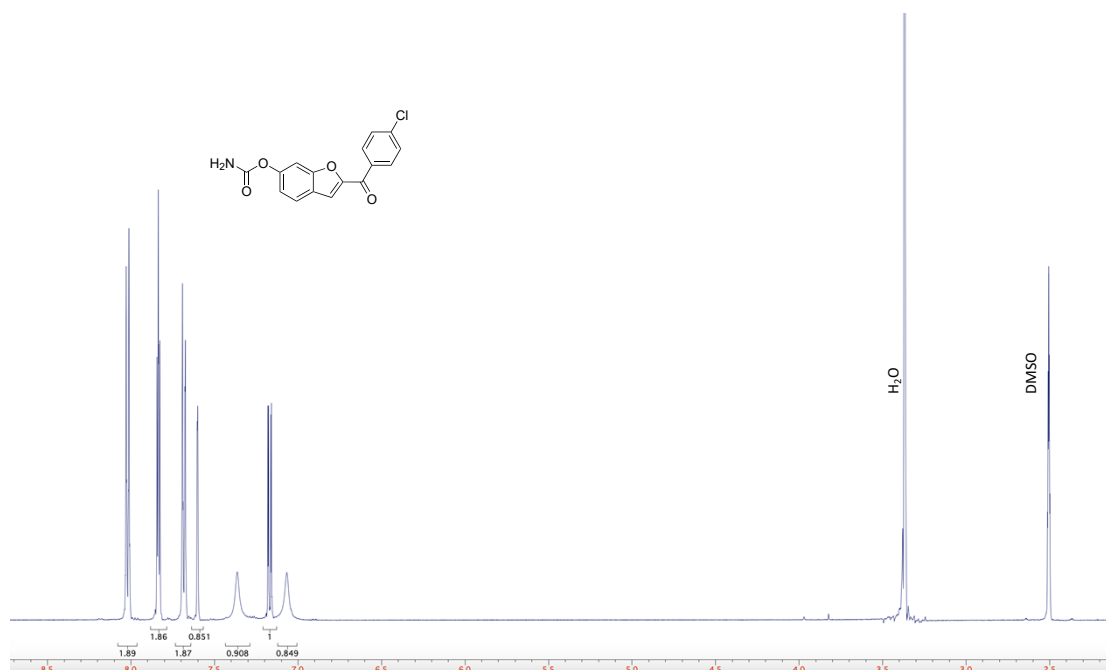

$^{13}\text{C}$  NMR ( $\text{DMSO}-d_6$ )

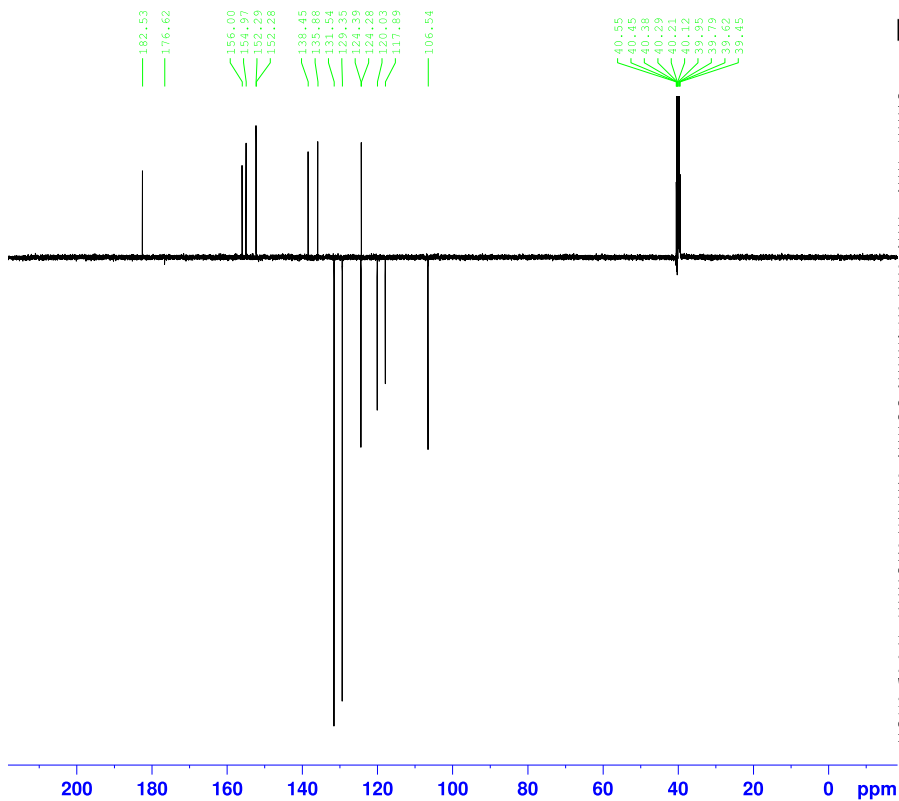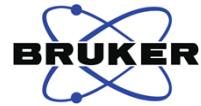

Current Data Parameters  
 NAME HAB3  
 EXPNO 2  
 PROCNO 1

F2 - Acquisition Parameters  
 Date\_ 20230729  
 Time 3.29 h  
 INSTRUM spect  
 PROBHD Z113652\_0266 ( jmod  
 PULPROG 65536  
 TD 4  
 SOLVENT DMSO  
 NS 1024  
 DS 4  
 SWH 29761.904 Hz  
 FIDRES 0.908261 Hz  
 AQ 1.1010048 sec  
 RG 189.93  
 DW 16.800 usec  
 DE 6.50 usec  
 TE 295.5 K  
 CNST2 145.000000  
 CNST11 1.000000  
 D1 2.0000000 sec  
 D20 0.00689655 sec  
 TD0 1  
 SF01 125.7703643 MHz  
 NUC1 13C  
 P1 10.00 usec  
 P2 20.00 usec  
 PLW1 74.29499817 W  
 SF02 500.1320005 MHz  
 NUC2 1H  
 CPDPRG[2] waltz16  
 PCPD2 80.00 usec  
 PLW2 21.58600044 W  
 PLW12 0.33726001 W

F2 - Processing parameters  
 SI 32768  
 SF 125.7577885 MHz  
 WDW EM  
 SSB 0  
 LB 1.00 Hz  
 GB 0  
 PC 1.40

### Compound 21

<sup>1</sup>H NMR (DMSO-*d*<sub>6</sub>)

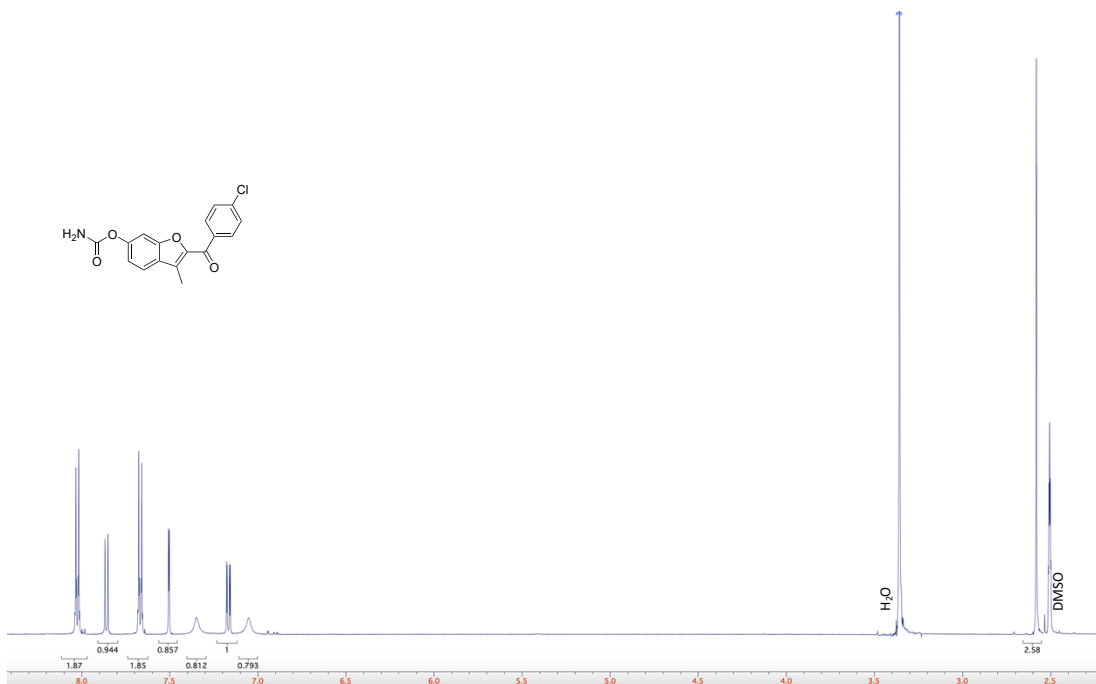

<sup>13</sup>C NMR (DMSO-d<sub>6</sub>)

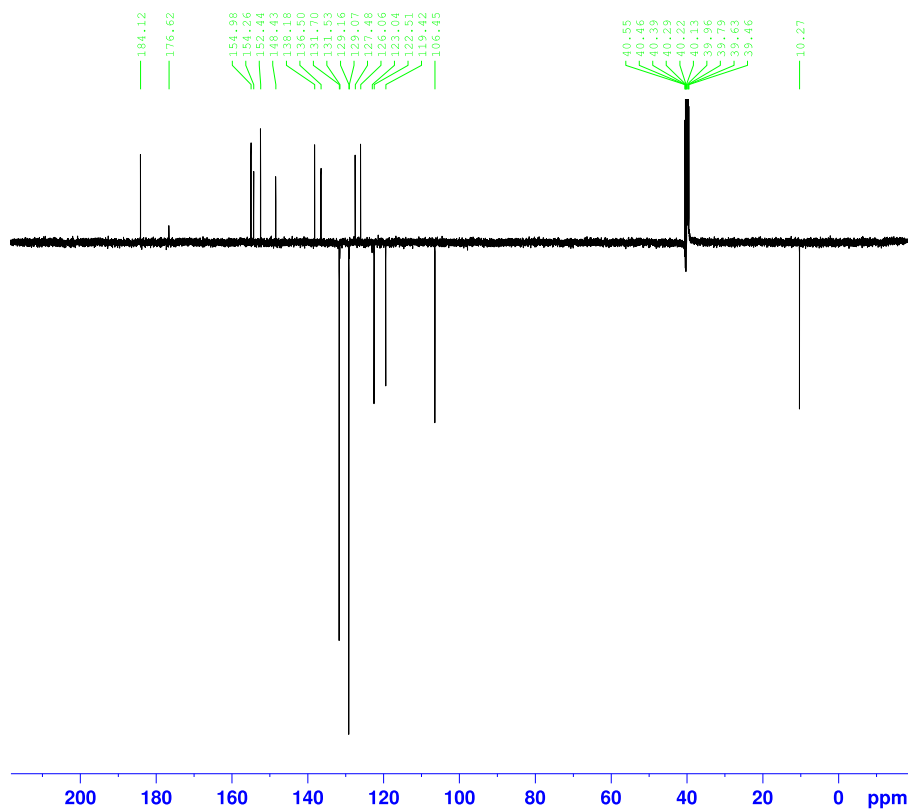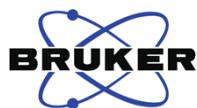

```

Current Data Parameters
NAME          HAB2-C
EXPNO         1
PROCNO        1

F2 - Acquisition Parameters
Date_         20230727
Time          22.43 h
INSTRUM       spect
PROBHD        Z113652_0266 (
PULPROG       jmod
TD            65536
SOLVENT       DMSO
NS            1024
DS            4
SWH           29761.904 Hz
FIDRES        0.908261 Hz
AQ            1.1010048 sec
RG            189.93
DW            16.800 usec
DE            6.50 usec
TE            295.1 K
CNST2         145.0000000
CNST11        1.0000000
D1            2.0000000 sec
D20           0.00689655 sec
TD0           1
SF01          125.7703643 MHz
NUC1          13C
P1            10.00 usec
P2            20.00 usec
PLW1          74.29499817 W
SF02          500.1320005 MHz
NUC2          1H
CPDPRG[2]    waltz16
PCPD2         80.00 usec
PLW2          21.58600044 W
PLW12         0.33728001 W

F2 - Processing parameters
SI            32768
SF            125.7577885 MHz
WDW           EM
SSB           0
LB            1.00 Hz
GB            0
PC            1.40
    
```
